# Supplementary material for: Rapid genome editing by CRISPR-Cas9-POLD3 fusion
Source: eLife. 2021 Dec 13;10:e75415. doi: 10.7554/eLife.75415 (PMC8747517; doi:10.7554/eLife.75415)
Supplement: Supplementary file 4. [file elife-75415-supp4.xlsx]

## Sheet: Main figures
Figure	Cell line	Comparison	Fusion	p value	% GFP, normalized to full experiment mean	SD	-LOG10(p)	dfs and F
Fig. 1b	HEK293T	Screen 1 and Screen 2	eGFP only (positive control 1)	1.592e-45	8.41727	0.51616	44.7981	F(1,2248)=209.805
	GFP-BFP-sgRNA	(experiment average-normalized	WTCas9 (different plasmid backbone than rest of the constructs, positive control 2)	2.426e-20	5.90484	0.484295	19.6151	F(1,2248)=87.072
		data points):	GTF2H2D	1.007e-11	4.6295	0.136169	10.997	F(1,2248)=46.805
		one-way Anova	phage T7_6_pDONR221	4.123e-10	4.33617	0.13006	9.38479	F(1,2248)=39.404
		(mean of each replicate group to the	GW_Halo	6.54e-10	4.29791	0.126253	9.18442	F(1,2248)=38.487
		mean of all other replicate groups)	GenEZ ORF Clone: OHu20078C	2.528e-09	4.18313	0.425285	8.59722	F(1,2248)=35.807
		n=6	GenEZ ORF Clone: OHu55904C	4.542e-09	4.13211	0.272339	8.34275	F(1,2248)=34.648
			KIAA0146	7.005e-09	4.09385	0.578562	8.15459	F(1,2248)=33.792
			E_coli_recD_pDONR221	9.324e-09	4.06835	0.236541	8.0304	F(1,2248)=33.228
			ATXN3_HUM_FL_pDONR221	1.075e-08	4.05559	0.19509	7.96859	F(1,2248)=32.947
			FEN1	4.312e-08	3.92806	0.32515	7.36532	F(1,2248)=30.212
			GenEZ ORF Clone: OHu27390C	1.251e-05	3.86429	0.0765206	4.90274	F(1,2248)=19.169
			GenEZ ORF Clone: OHu31768C	2.128e-05	3.78777	0	4.67203	F(1,2248)=18.148
			GenEZ ORF Clone: OHu24336C	2.117e-07	3.77502	0.620347	6.67428	F(1,2248)=27.091
			phage_T5_D15_pDONR221	2.738e-07	3.74951	0.270541	6.56257	F(1,2248)=26.588
			SWI5_HUM_FL_pDONR221	2.501e-06	3.51995	0.555324	5.60189	F(1,2248)=22.280
			GW_eDHFR	1.231e-05	3.48169	0.631778	5.44953	F(1,2248)=21.600
			GenEZ ORF Clone: OHu23325C	2.357e-05	3.3414	0.336942	4.90974	F(1,2248)=19.200
			GenEZ ORF Clone: OHu22165C	2.357e-05	3.26488	0.172053	4.62764	F(1,2248)=17.952
			ALKBH1	3.237e-05	3.26488	0.390597	4.62764	F(1,2248)=17.952
			GW_SNAP	3.309e-06	3.22662	0.147632	4.48986	F(1,2248)=17.344
			E_coli_exoX_pDONR221	7.36e-05	3.15648	0.250159	5.4803	F(1,2248)=21.738
			GenEZ ORF Clone: OHu22043C	6.015e-06	3.12459	0.100421	4.13312	F(1,2248)=15.775
			XRCC3_HUM_FL_pDONR221	0.00012079	3.09909	0.404004	5.22076	F(1,2248)=20.582
			C_jej_1057c_pDONR221	1.303e-05	3.06082	0.218676	3.91797	F(1,2248)=14.832
			POLR2K_HUM_FL_pDONR221	0.00025929	3.02256	1.02912	4.88506	F(1,2248)=19.091
			phage T7_3_pDONR221	0.00025929	2.9588	0.0360722	3.58621	F(1,2248)=13.386
			SETD2_2000_2500_pDONR221	9.515e-05	2.9588	0.160308	3.58621	F(1,2248)=13.386
			phage T5_12_pDONR221	2.015e-06	2.81213	0.149411	4.02159	F(1,2248)=15.286
			CCNH	0.00011286	2.79938	0.932332	5.69572	F(1,2248)=22.700
			M_avi_recC_pDONR221	0.00117037	2.793	0.643069	3.94746	F(1,2248)=14.961
			GenEZ ORF Clone: OHu22734C	0.00028024	2.74199	0.183046	2.93168	F(1,2248)=10.564
			DIS3L2_1500_pDONR221	0.00191905	2.68779	0.282939	3.55247	F(1,2248)=13.240
			RAD50_900_1300_pDONR221	0.00243958	2.66547	0.316018	2.71691	F(1,2248)=9.648
			GW_Streptavidin	0.00263993	2.62721	0.35527	2.61268	F(1,2248)=9.206
			GenEZ ORF Clone: OHu18192C	0.00052628	2.61445	0.0901804	2.57841	F(1,2248)=9.061
			M_avi_1792_pDONR221	0.00333449	2.61127	0.306531	3.27878	F(1,2248)=12.055
			SLX4_600_1000_pDONR221	0.00071416	2.57619	0.0360722	2.47697	F(1,2248)=8.633
			E_coli_orn_pDONR221	0.00360062	2.57301	0.503508	3.1462	F(1,2248)=11.484
			GenEZ ORF Clone: OHu09979C	0.00089407	2.56344	1.81431	2.44362	F(1,2248)=8.493
			XPC_multi_domain_pDONR221	0.00607221	2.54431	0.116364	3.04863	F(1,2248)=11.065
			S_aureus_nuc_pDONR221	0.00753646	2.47417	0.208002	2.21665	F(1,2248)=7.543
			ABL1_1500_pDONR221	0.00041495	2.43591	0.172053	2.12283	F(1,2248)=7.153
			RPA2	0.00056959	2.34026	0.782052	3.382	F(1,2248)=12.501
			RAD51AP1	0.00093219	2.30837	0.546764	3.24444	F(1,2248)=11.907
			CCNH	0.00093219	2.25736	0.713395	3.0305	F(1,2248)=10.987
			MORF4L1	0.00783523	2.25736	0.96261	3.0305	F(1,2248)=10.987
			CETN2_HUM_FL_pDONR221	0.00885269	2.23823	0.444133	2.10595	F(1,2248)=7.083
			EXO5_HUM_FL_pDONR221	0.00133355	2.2191	0.796605	2.05292	F(1,2248)=6.864
			CCNH	0.0282059	2.2191	0.328386	2.87499	F(1,2248)=10.321
			FANCL_HUM_FL_pDONR221	0.00200031	2.18084	0.317045	1.54966	F(1,2248)=4.822
			RPA4/SNAP control	0.0358255	2.17446	0.760542	2.6989	F(1,2248)=9.572
			E_coli_recE_pDONR221	0.00348923	2.12982	0.172053	1.44581	F(1,2248)=4.411
			HMGB2	0.0041016	2.11069	0.733101	2.45727	F(1,2248)=8.550
			POLD3	0.0426338	2.09156	1.08344	2.38705	F(1,2248)=8.255
			GenEZ ORF Clone: OHu21550C	0.0234559	2.09156	0.238595	1.37025	F(1,2248)=4.115
			M_avi_1789_pDONR221	0.00592603	2.05649	0.169763	1.62975	F(1,2248)=5.141
			HMGB1	0.00592603	2.04693	0.702974	2.22724	F(1,2248)=7.587
			SIRT6	0.0290221	2.04693	0.70816	2.22724	F(1,2248)=7.587
			E_coli_sbcB_pDONR221	0.00764644	2.01823	0.438223	1.53727	F(1,2248)=4.772
			Cas9WT	0.00764644	2.01504	0.745722	2.11654	F(1,2248)=7.127
			POLR2I	0.00803997	2.01504	0.312914	2.11654	F(1,2248)=7.127
			APEX1	0.0663102	2.00867	0.81305	2.09475	F(1,2248)=7.037
			RAD50_multi_domain_pDONR221	0.0102923	1.98954	0.0312394	1.17842	F(1,2248)=3.375
			RAD51D	0.0776104	1.97678	0.577577	1.98749	F(1,2248)=6.595
			BLM_420_1000_pDONR221	0.0436187	1.95128	0.124958	1.11008	F(1,2248)=3.117
			E_coli_xseB_pDONR221	0.0137234	1.94171	0.112771	1.36033	F(1,2248)=4.076
			RAD51AP1	0.0173167	1.93852	0.261989	1.86254	F(1,2248)=6.083
			LIG4	0.115528	1.90664	0.589597	1.76154	F(1,2248)=5.672
			phage_T5_exo2_pDONR221	0.12115	1.84925	0.0901804	0.937312	F(1,2248)=2.479
			GenEZ ORF Clone: OHu21280C	0.0294703	1.83649	0.35205	0.916676	F(1,2248)=2.404
			RFC5	0.0294703	1.83012	0.830468	1.53062	F(1,2248)=4.746
			AEN	0.126984	1.83012	0.576626	1.53061	F(1,2248)=4.746
			GenEZ ORF Clone: OHu19368C	0.041153	1.82374	0.424136	0.896252	F(1,2248)=2.331
			SHFM1	0.0411529	1.7791	0.23868	1.3856	F(1,2248)=4.175
			KIAA1530	0.0446218	1.7791	0.531414	1.3856	F(1,2248)=4.175
			MSH4	0.0464468	1.76635	0.726414	1.35045	F(1,2248)=4.037
			TREX1	0.159481	1.75997	0.399449	1.33304	F(1,2248)=3.970
			GenEZ ORF Clone: OHu26186C	0.0483341	1.75997	0.301262	0.79729	F(1,2248)=1.980
			RAD51AP1	0.0502853	1.7536	0.576203	1.31575	F(1,2248)=3.903
			HELQ	0.0543861	1.74722	0.866765	1.29856	F(1,2248)=3.836
			UBE2I	0.058762	1.73447	0.567779	1.26451	F(1,2248)=3.705
			SFR1	0.189723	1.72171	0.493444	1.2309	F(1,2248)=3.576
			phage_T5_exo5_pDONR221	0.0658703	1.70896	0.118271	0.72188	F(1,2248)=1.721
			APTX	0.0683917	1.70258	0.250646	1.18131	F(1,2248)=3.386
			SNAP control	0.0736723	1.69621	0.724481	1.165	F(1,2248)=3.324
			XRCC2	0.0792816	1.68345	0.56577	1.1327	F(1,2248)=3.202
			OGG1	0.0822137	1.6707	0.344815	1.10083	F(1,2248)=3.082
			SIRT6	0.22399	1.66432	0.505533	1.08506	F(1,2248)=3.023
			E_coli_xseA_pDONR221	0.085233	1.65795	0.172053	0.649772	F(1,2248)=1.479
			RFC4	0.0883413	1.65795	0.555178	1.06939	F(1,2248)=2.965
			PIAS1	0.0883413	1.65157	0.350951	1.05384	F(1,2248)=2.907
			APEX1	0.168531	1.65157	0.490676	1.05384	F(1,2248)=2.907
			LIG4_multi_domain_pDONR221	0.175012	1.64519	0.185474	0.773319	F(1,2248)=1.897
			E_coli_xthA_pDONR221	0.101698	1.63563	0.138941	0.756933	F(1,2248)=1.841
			Cas9WT	0.105277	1.62606	0.702974	0.992686	F(1,2248)=2.681
			RBBP8	0.272758	1.61969	0.251537	0.977666	F(1,2248)=2.626
			RPA3_HUM_FL_pDONR221	0.12889	1.59418	0.100421	0.564222	F(1,2248)=1.203
			ERCC1	0.12889	1.58143	0.392466	0.889781	F(1,2248)=2.308
			MLST8	0.137615	1.58143	0.425285	0.889782	F(1,2248)=2.308
			ISG20	0.137615	1.56867	0.309254	0.861334	F(1,2248)=2.206
			SMUG1	0.142145	1.56867	0.297185	0.861334	F(1,2248)=2.206
			USP47	0.181378	1.5623	0.39479	0.847269	F(1,2248)=2.156
			GTF2H1	0.146788	1.56102	0.235106	0.741416	F(1,2248)=1.787
			POLR2F	0.340265	1.55592	0.374656	0.833308	F(1,2248)=2.107
			GenEZ ORF Clone: OHu04471C	0.188197	1.51766	0.212642	0.468182	F(1,2248)=0.910
			UBQLN4	0.285963	1.50491	0.346227	0.725388	F(1,2248)=1.733
			NABP1_HUM_FL_pDONR221	0.285963	1.50172	0.384868	0.543691	F(1,2248)=1.139
			EXOSC10_1500_pDONR221	0.199781	1.50172	0.195792	0.543691	F(1,2248)=1.139
			PCNA	0.205765	1.49215	0.294712	0.699446	F(1,2248)=1.645
			RNF20	0.211877	1.48578	0.205346	0.68663	F(1,2248)=1.602
			POLR2J	0.377723	1.4794	0.193415	0.673916	F(1,2248)=1.559
			NEIL3_HUM_FL_pDONR221	0.224494	1.4794	0.095438	0.422827	F(1,2248)=0.778
			DCLRE1C	0.237638	1.46665	0.429282	0.648796	F(1,2248)=1.476
			CCDC155	0.24441	1.45389	0.508061	0.624084	F(1,2248)=1.395
			RAD23A	0.345643	1.44752	0.311938	0.611881	F(1,2248)=1.356
			GEN1_1600_pDONR221	0.295605	1.44433	0.119084	0.461372	F(1,2248)=0.890
			ALKBH1/eDHFR control/WT/empty	0.295605	1.40288	1.08816	0.529288	F(1,2248)=1.094
			FANCE	0.303466	1.40288	0.482276	0.529288	F(1,2248)=1.094
			SMC6	0.311464	1.3965	0.442757	0.517891	F(1,2248)=1.059
			RAD51C	0.327873	1.39012	0.44216	0.506592	F(1,2248)=1.025
			GTF2H3	0.371887	1.37737	0.575603	0.484294	F(1,2248)=0.958
			ZRANB3	0.504456	1.37737	0.53455	0.429589	F(1,2248)=0.798
			GenEZ ORF Clone: OHu12315C	0.344833	1.36462	0.0360722	0.297177	F(1,2248)=0.446
			RAD1	0.461416	1.36462	0.436607	0.462391	F(1,2248)=0.893
			NEIL1_HUM_FL_pDONR221	0.371302	1.34868	0.171906	0.335907	F(1,2248)=0.543
			MLH1	0.380397	1.34549	0.337484	0.430273	F(1,2248)=0.800
			AEN	0.389628	1.33911	0.498364	0.419763	F(1,2248)=0.770
			HMGA1	0.398994	1.33273	0.299163	0.409349	F(1,2248)=0.740
			SMC5	0.437791	1.32636	0.364757	0.399033	F(1,2248)=0.712
			POLR2C	0.437791	1.30085	0.478381	0.358733	F(1,2248)=0.602
			ZFYVE26	0.599975	1.30085	0.569638	0.358733	F(1,2248)=0.602
			ERCC5_multi_domain_pDONR221	0.457976	1.2881	0.0786175	0.221867	F(1,2248)=0.275
			Cas9WT/eDHFR	0.553891	1.2881	0.360722	0.339158	F(1,2248)=0.551
			ERCC4_500917_pDONR221	0.46826	1.28172	0.0788757	0.256576	F(1,2248)=0.350
			POLD4	0.499868	1.28172	0.130216	0.329513	F(1,2248)=0.526
			PMS1	0.51065	1.26259	0.295539	0.301145	F(1,2248)=0.455
			XRN2	0.532572	1.25621	0.855645	0.291877	F(1,2248)=0.433
			LIG3	0.532572	1.24346	0.273902	0.273621	F(1,2248)=0.390
			MCM8	0.667873	1.24346	0.25737	0.273621	F(1,2248)=0.390
			Cas9WT	0.554961	1.23708	0.555617	0.175306	F(1,2248)=0.184
			POLR2H	0.554961	1.23071	0.515884	0.255737	F(1,2248)=0.349
			RAD51D/SNAP control	0.612864	1.23071	0.308794	0.255737	F(1,2248)=0.349
			RFC3	0.612864	1.19882	0.308201	0.212636	F(1,2248)=0.256
			ERCC1	0.612864	1.19882	0.251537	0.212636	F(1,2248)=0.256
			POLE2	0.624757	1.19882	0.274717	0.212636	F(1,2248)=0.256
			SWSAP1	0.636749	1.19245	0.333119	0.204289	F(1,2248)=0.239
			MPG	0.636749	1.18607	0.423752	0.196032	F(1,2248)=0.223
			DCLRE1A	0.661017	1.18607	0.53061	0.196032	F(1,2248)=0.223
			FAM175A	0.685647	1.17332	0.633963	0.179787	F(1,2248)=0.192
			POLE	0.723219	1.16056	0.331098	0.163899	F(1,2248)=0.164
			POLR2E	0.805489	1.14143	0.138684	0.14073	F(1,2248)=0.125
			LIG1	0.825713	1.10955	0.252634	0.0939404	F(1,2248)=0.061
			M_avi_1790_pDONR221	0.800311	1.10955	0.231151	0.0831709	F(1,2248)=0.049
			CDC45	0.819821	1.10317	0.205346	0.0967411	F(1,2248)=0.064
			RFC1	0.819821	1.1019	0.264412	0.0862807	F(1,2248)=0.052
			CHEK1	0.839653	1.1019	0.477503	0.0862807	F(1,2248)=0.052
			POLL	0.852862	1.08404	0.435488	0.0759	F(1,2248)=0.041
			GEN1	0.8794	1.07767	0.204155	0.0691212	F(1,2248)=0.034
			MMS22L/SNAP control	0.906074	1.06491	0.306414	0.0558136	F(1,2248)=0.023
			POLD2	0.921575	1.05216	0.377952	0.0428364	F(1,2248)=0.014
			SFPQ	0.932854	1.04833	0.186811	0.0354694	F(1,2248)=0.010
			POLE2	0.946275	1.03941	0.372534	0.0301862	F(1,2248)=0.007
			HMGA1	0.959711	1.03303	0.136169	0.0239827	F(1,2248)=0.005
			OBFC2B	0.973158	1.02665	0.221356	0.0178597	F(1,2248)=0.003
			DDB2	0.973158	1.02027	0.449819	0.0118166	F(1,2248)=0.001
			POLR2D	0.973158	1.02027	0.142588	0.0118166	F(1,2248)=0.001
			REXO2	0.981031	1.02027	0.213787	0.0118166	F(1,2248)=0.001
			Cas9WT	0.980413	1.02027	0.290263	0.00831738	F(1,2248)=0.001
			PALB2	0.986613	1.01772	0.328772	0.00859086	F(1,2248)=0.001
			HMGA2	0.986613	1.0139	0.248692	0.00585313	F(1,2248)=0.000
			POLD1	0.986613	1.0139	0.348393	0.00585315	F(1,2248)=0.000
			SLC30A9	0.995152	1.0139	0.760649	0.00585316	F(1,2248)=0.000
			KIAA0146/SNAP control	0.999928	1.01007	0.183649	0.00211059	F(1,2248)=0.000
			BRCA1	0.999949	1.00752	0.19215	3.11878e-05	F(1,2248)=0.000
			ERCC2_300761_pDONR221	0.973015	1.00752	0.252505	2.19976e-05	F(1,2248)=0.000
			TCEA1/SNAP control	0.96192	0.994768	0.305284	0.0118806	F(1,2248)=0.001
			HUWE1_3000_3500_pDONR221	0.942933	0.982015	0.395562	0.0168609	F(1,2248)=0.002
			GenEZ ORF Clone: OHu25748C	0.89258	0.969261	0.109709	0.0255193	F(1,2248)=0.005
			DNA2/SNAP control	0.892579	0.956508	0.313952	0.0493531	F(1,2248)=0.018
			POLR2L	0.905066	0.956508	0.112635	0.0493531	F(1,2248)=0.018
			USP7	0.905066	0.943754	0.100421	0.04332	F(1,2248)=0.014
			CNOT1_1800_2350_pDONR221	0.872726	0.943754	0.281733	0.04332	F(1,2248)=0.014
			GTF2H4	0.852721	0.941204	0.109828	0.0591222	F(1,2248)=0.026
			H2AFX	0.813235	0.937378	0.0788757	0.0691931	F(1,2248)=0.034
			PALB2_1500_pDONR221	0.813235	0.918247	1.20727	0.0897841	F(1,2248)=0.056
			CCNO	0.813235	0.918247	0.241979	0.0897841	F(1,2248)=0.056
			CNOT7	0.800172	0.918247	0.419702	0.0897841	F(1,2248)=0.056
			ERCC8	0.814909	0.911871	0.470367	0.0968166	F(1,2248)=0.064
			INO80	0.848693	0.910595	0.35016	0.0888906	F(1,2248)=0.055
			MMS19_1500_pDONR221	0.774217	0.905494	0.296911	0.0712492	F(1,2248)=0.036
			RAD51B	0.761332	0.899117	0.491338	0.111137	F(1,2248)=0.082
			HMGN1	0.748512	0.892741	0.137359	0.118426	F(1,2248)=0.092
			SLX1B	0.723084	0.886364	0.218024	0.125801	F(1,2248)=0.103
			PNKP	0.710481	0.87361	0.260823	0.140811	F(1,2248)=0.126
			PARP1	0.710481	0.867234	0.245649	0.148447	F(1,2248)=0.138
			CNOT8	0.793084	0.867234	0.25918	0.148447	F(1,2248)=0.138
			GenEZ ORF Clone: OHu27000C	0.730133	0.867234	0.230269	0.100681	F(1,2248)=0.069
			ZSWIM7	0.822869	0.864683	0.129408	0.136598	F(1,2248)=0.119
			GenEZ ORF Clone: OHu31586C	0.697957	0.860857	0.0573905	0.0846691	F(1,2248)=0.050
			APLF	0.685515	0.860857	0.307474	0.156171	F(1,2248)=0.151
			Cas9WT	0.68888	0.85448	0.645026	0.163983	F(1,2248)=0.164
			BRCA2	0.660887	0.841727	0.303199	0.161857	F(1,2248)=0.160
			TP53	0.738507	0.841727	0.348568	0.179873	F(1,2248)=0.192
			phage_T5_D13_pDONR221	0.62463	0.828973	0.047719	0.131645	F(1,2248)=0.111
			DCLRE1B	0.612738	0.822597	0.366148	0.204377	F(1,2248)=0.239
			PMS1	0.612738	0.81622	0.160308	0.212725	F(1,2248)=0.256
			DIS3L2	0.612738	0.81622	0.305018	0.212725	F(1,2248)=0.256
			MMS19	0.600947	0.81622	0.187002	0.212725	F(1,2248)=0.256
			SLX1B	0.600947	0.809843	0.159927	0.221164	F(1,2248)=0.274
			CDK7	0.589259	0.809843	0.274495	0.221164	F(1,2248)=0.274
			SFR1	0.702823	0.803467	0.233774	0.229694	F(1,2248)=0.292
			Cas9WT	0.659478	0.803467	0.286314	0.153154	F(1,2248)=0.146
			BRCA2_1000_1500_pDONR221	0.609188	0.803467	0.0468591	0.1808	F(1,2248)=0.194
			SLX4	0.685217	0.795814	0.258816	0.215248	F(1,2248)=0.261
			ERCC6_1000_1494_pDONR221	0.596314	0.790713	0.172053	0.164172	F(1,2248)=0.164
			Cas9WT/eDHFR	0.554841	0.788162	0.391379	0.224525	F(1,2248)=0.281
			ANTXR1	0.54359	0.784336	0.522152	0.255832	F(1,2248)=0.349
			PRMT6	0.54359	0.77796	0.577577	0.264728	F(1,2248)=0.369
			Cas9WT	0.54359	0.77796	0.832302	0.264728	F(1,2248)=0.369
			Cas9WT	0.532454	0.77796	0.991739	0.264728	F(1,2248)=0.369
			POLK	0.521435	0.771583	0.268201	0.273718	F(1,2248)=0.390
			Cas9WT	0.650521	0.765206	0.645531	0.2828	F(1,2248)=0.411
			MLH1_1400_pDONR221	0.521435	0.765206	0.225271	0.186738	F(1,2248)=0.205
			POLR2A	0.558454	0.765206	0.358233	0.2828	F(1,2248)=0.411
			UBE2N	0.499754	0.765206	0.203896	0.253012	F(1,2248)=0.342
			POLR2C	0.633448	0.752453	0.431549	0.301244	F(1,2248)=0.456
			MDC1_1100_1700_pDONR221	0.633448	0.752453	0.234469	0.198289	F(1,2248)=0.227
			BLM_600_1100_pDONR221	0.489095	0.752453	0.0901804	0.198289	F(1,2248)=0.227
			RNF8	0.47856	0.746076	0.288648	0.310607	F(1,2248)=0.479
			GTF2H5	0.47856	0.739699	0.410098	0.320064	F(1,2248)=0.502
			MSH2	0.544611	0.739699	0.19215	0.320064	F(1,2248)=0.502
			HUWE1_3600_4375_pDONR221	0.583413	0.726946	0.0937182	0.263914	F(1,2248)=0.367
			MMS19_300800_pDONR221	0.463584	0.714192	0.30018	0.234024	F(1,2248)=0.301
			FANCB	0.567153	0.70399	0.215891	0.333872	F(1,2248)=0.537
			ATM_1960_2566_pDONR221	0.567153	0.701439	0.242651	0.2463	F(1,2248)=0.328
			LIG4_300912_pDONR221	0.45239	0.701439	0.261989	0.2463	F(1,2248)=0.328
			POLN	0.408393	0.696338	0.274196	0.344487	F(1,2248)=0.565
			FANCG	0.398894	0.695062	0.40335	0.388922	F(1,2248)=0.684
			Cas9WT	0.398894	0.688686	0.604142	0.399143	F(1,2248)=0.712
			ERCC4	0.551114	0.688686	0.139707	0.399143	F(1,2248)=0.712
			HELQ_1500_pDONR221	0.389529	0.688686	0.298005	0.258759	F(1,2248)=0.355
			ERCC5	0.3803	0.682309	0.173114	0.40946	F(1,2248)=0.741
			MSH5	0.5353	0.675932	0.118271	0.419874	F(1,2248)=0.770
			BRCA2_1_500_pDONR221	0.5353	0.675932	0.269336	0.271403	F(1,2248)=0.384
			DCLRE1A_1500_pDONR221	0.5353	0.675932	0.25443	0.271403	F(1,2248)=0.384
			BRCA2_500_1000_pDONR221	0.519719	0.675932	0.118271	0.271402	F(1,2248)=0.384
			ABL1_6001150_pDONR221	0.398764	0.663179	0.06503	0.284231	F(1,2248)=0.415
			USP7/Cas9WT	0.353426	0.658077	0.527604	0.399284	F(1,2248)=0.712
			FANCC	0.353426	0.656802	0.417614	0.451702	F(1,2248)=0.861
			RAD23B	0.504375	0.656802	0.158394	0.451702	F(1,2248)=0.861
			DNA2_80520_pDONR221	0.336194	0.650425	0.330607	0.297247	F(1,2248)=0.446
			HUS1B	0.336194	0.644049	0.234209	0.47341	F(1,2248)=0.925
			RAD50_900_1300_pDONR221	0.336194	0.644049	0.186676	0.47341	F(1,2248)=0.925
			TONSL	0.336194	0.644049	0.222455	0.47341	F(1,2248)=0.925
			XPC_400940_pDONR221	0.489273	0.644049	0.238339	0.47341	F(1,2248)=0.925
			BRCA2_3000_3419_pDONR221	0.489273	0.637672	0.250565	0.310449	F(1,2248)=0.478
			ERCC6_1_500_pDONR221	0.489273	0.637672	0.109709	0.310449	F(1,2248)=0.478
			ERCC3_40700_pDONR221	0.474417	0.637672	0.172053	0.310449	F(1,2248)=0.478
			CNOT1_260_685_pDONR221	0.474417	0.624918	0.272935	0.32384	F(1,2248)=0.512
			ERCC6_500_1000_pDONR221	0.303381	0.624918	0.32515	0.32384	F(1,2248)=0.512
			CDC7	0.303381	0.618542	0.181373	0.518012	F(1,2248)=1.060
			SPIDR_400916_pDONR221	0.459813	0.618542	0.1931	0.518012	F(1,2248)=1.060
			ATR_2100_2645_pDONR221	0.339725	0.612165	0.136169	0.337419	F(1,2248)=0.547
			ATR	0.280215	0.612165	0.250305	0.468872	F(1,2248)=0.912
			CNOT6	0.280215	0.599412	0.354582	0.552508	F(1,2248)=1.167
			SLX4_600_1000_pDONR221	0.280215	0.599412	0.195922	0.552508	F(1,2248)=1.167
			C20orf72	0.445464	0.599412	0.424711	0.552508	F(1,2248)=1.167
			BLM_1_600_pDONR221	0.445464	0.599412	0.172053	0.351188	F(1,2248)=0.582
			FANCA_700_1200_pDONR221	0.445464	0.599412	0.290263	0.351188	F(1,2248)=0.582
			GenEZ ORF Clone: OHu19811C	0.272768	0.599412	0.0786175	0.351188	F(1,2248)=0.582
			FAN1	0.312423	0.593035	0.263922	0.564207	F(1,2248)=1.203
			MSH2_300934_pDONR221	0.265457	0.589209	0.446582	0.505257	F(1,2248)=1.021
			ATM	0.265457	0.586658	0.305018	0.576007	F(1,2248)=1.241
			LIG3	0.265457	0.586658	0.44491	0.576007	F(1,2248)=1.241
			ATRIP	0.303653	0.586658	0.25918	0.576007	F(1,2248)=1.241
			SLX1A	0.258281	0.581557	0.163045	0.517623	F(1,2248)=1.059
			PMS1_1500_pDONR221	0.258281	0.580281	0.350255	0.587907	F(1,2248)=1.279
			WDR48	0.258281	0.580281	0.227873	0.587907	F(1,2248)=1.279
			POLR2G	0.417544	0.580281	0.191832	0.587907	F(1,2248)=1.279
			ERCC3_1500_pDONR221	0.417544	0.573905	0.330607	0.379298	F(1,2248)=0.657
			MTOR_1000_1500_pDONR221	0.417544	0.573905	0.243988	0.379298	F(1,2248)=0.657
			BRCA2_2000_2500_pDONR221	0.417544	0.573905	0.235852	0.379298	F(1,2248)=0.657
			HUWE1_2000_2500_pDONR221	0.417544	0.573905	0.225271	0.379298	F(1,2248)=0.657
			MLH3_500_1000_pDONR221	0.417544	0.573905	0.225271	0.379298	F(1,2248)=0.657
			LIG3_5001010_pDONR221	0.403979	0.573905	0.143157	0.379298	F(1,2248)=0.657
			MDC1_1_500_pDONR221	0.403979	0.561151	0.320616	0.393641	F(1,2248)=0.697
			DCLRE1A_4001041_pDONR221	0.403979	0.561151	0.100421	0.393641	F(1,2248)=0.697
			MCM8_1500_pDONR221	0.278331	0.561151	0.238595	0.393641	F(1,2248)=0.697
			POLQ	0.230929	0.558601	0.039018	0.555439	F(1,2248)=1.176
			NBN_200754_pDONR221	0.390682	0.554775	0.128329	0.636521	F(1,2248)=1.436
			ATM_2600_3057_pDONR221	0.224425	0.548398	0.208002	0.408177	F(1,2248)=0.737
			MLH3	0.390682	0.548398	0.161823	0.648929	F(1,2248)=1.477
			BARD1_1500_pDONR221	0.390682	0.548398	0.160308	0.408177	F(1,2248)=0.737
			MDC1_1700_2090_pDONR221	0.390682	0.548398	0.172053	0.408177	F(1,2248)=0.737
			AP5Z1_200600_pDONR221	0.390682	0.548398	0.438837	0.408177	F(1,2248)=0.737
			LIG4_250920_pDONR221	0.218053	0.548398	0.140866	0.408177	F(1,2248)=0.737
			PRKDC_2000_2500_pDONR221	0.211811	0.542021	0.236283	0.661439	F(1,2248)=1.518
			MSH3_1500_pDONR221	0.211811	0.535644	0.25475	0.674051	F(1,2248)=1.560
			XPA	0.377654	0.535644	0.381326	0.674051	F(1,2248)=1.560
			BRCA2_1500_2000_pDONR221	0.377654	0.535644	0.225271	0.422906	F(1,2248)=0.779
			INO80_1_526_pDONR221	0.377654	0.535644	0.255706	0.422906	F(1,2248)=0.779
			HELQ_7001101_pDONR221	0.377654	0.535644	0.235852	0.422906	F(1,2248)=0.779
			BARD1_200778_pDONR221	0.377654	0.535644	0.330607	0.422906	F(1,2248)=0.779
			HELQ_350720_pDONR221	0.2057	0.535644	0.243988	0.422906	F(1,2248)=0.779
			MCM9	0.364897	0.529268	0.328695	0.686766	F(1,2248)=1.602
			BRCA1_1300_1885_pDONR221	0.364897	0.522891	0.242651	0.43783	F(1,2248)=0.821
			MMS22L1_1600_pDONR221	0.364897	0.522891	0.140866	0.43783	F(1,2248)=0.821
			FANCA_1000_1500_pDONR221	0.364897	0.522891	0.0901804	0.43783	F(1,2248)=0.821
			MRE11A_300708_pDONR221	0.193864	0.522891	0.13006	0.43783	F(1,2248)=0.821
			NGLY1	0.352412	0.516514	0.22062	0.712504	F(1,2248)=1.689
			DBB1_5001141_pDONR221	0.188136	0.510137	0.109709	0.452949	F(1,2248)=0.865
			PAN3	0.352412	0.510137	0.135571	0.725528	F(1,2248)=1.733
			FAN1_1509_pDONR221	0.352412	0.510137	0.252505	0.452949	F(1,2248)=0.865
			DIS3L2_200600_pDONR221	0.182535	0.510137	0.208002	0.452949	F(1,2248)=0.865
			APEX2	0.177058	0.503761	0.21914	0.738655	F(1,2248)=1.778
			ATM	0.177058	0.497384	0.268732	0.751885	F(1,2248)=1.823
			RAD51	0.171704	0.497384	0.172525	0.751885	F(1,2248)=1.823
			DCLRE1C	0.171704	0.491007	0.205346	0.76522	F(1,2248)=1.869
			AP5Z1	0.171704	0.491007	0.213501	0.76522	F(1,2248)=1.869
			ZFYVE26_1500_2000_pDONR221	0.166472	0.491007	0.16295	0.76522	F(1,2248)=1.869
			POLD1_5801134_pDONR221	0.166472	0.484631	0.170629	0.778659	F(1,2248)=1.916
			MSH4_300937_pDONR221	0.166472	0.484631	0.181709	0.778659	F(1,2248)=1.916
			TP53BP1_1400_1978_pDONR221	0.328264	0.484631	0.0874332	0.778659	F(1,2248)=1.916
			DNA2_5201061_pDONR221	0.328264	0.484631	0.13006	0.483776	F(1,2248)=0.956
			HUWE1_1_500_pDONR221	0.328264	0.484631	0.200841	0.483776	F(1,2248)=0.956
			HUWE1_1500_2000_pDONR221	0.328264	0.484631	0.0721443	0.483776	F(1,2248)=0.956
			MLH3_1000_1454_pDONR221	0.328264	0.484631	0.109709	0.483776	F(1,2248)=0.956
			ATR_1_500_pDONR221	0.161361	0.484631	0.126253	0.483776	F(1,2248)=0.956
			REC8	0.161361	0.478254	0.280068	0.792201	F(1,2248)=1.963
			SETD2_2000_2500_pDONR221	0.316603	0.478254	0.399297	0.792201	F(1,2248)=1.963
				0.156369	0.471877	0.348335	0.801096	F(1,2248)=1.994
			HUWE1_500_1000_pDONR221	0.156369	0.471877	0.140866	0.499486	F(1,2248)=1.003
			ERCC3	0.151496	0.471877	0.097961	0.805849	F(1,2248)=2.010
			SETD2_1000_1500_pDONR221	0.146738	0.471877	0.218304	0.805849	F(1,2248)=2.010
			HUS1	0.146738	0.4655	0.290053	0.8196	F(1,2248)=2.059
			TREX2	0.305216	0.459124	0.105938	0.833457	F(1,2248)=2.107
			RAD50_1_500_pDONR221	0.305216	0.459124	0.15929	0.833457	F(1,2248)=2.107
			EXOSC10_200600_pDONR221	0.305216	0.459124	0.247955	0.515393	F(1,2248)=1.052
			EXOSC10_300886_pDONR221	0.146738	0.459124	0.112635	0.515393	F(1,2248)=1.052
			MLH1_200756_pDONR221	0.146738	0.459124	0.190022	0.515393	F(1,2248)=1.052
			PALB2_5001100_pDONR221	0.305216	0.459124	0.224185	0.833457	F(1,2248)=2.107
			PRKDC_1000_1500_pDONR221	0.142096	0.459124	0.259494	0.833457	F(1,2248)=2.107
			PAN3_200600_pDONR221	0.294104	0.459124	0.0937182	0.515393	F(1,2248)=1.052
			C16orf73	0.294104	0.452747	0.346051	0.847418	F(1,2248)=2.157
			FANCB_300860_pDONR221	0.137567	0.44637	0.38809	0.531499	F(1,2248)=1.101
			BRCA1_300_800_pDONR221	0.133151	0.44637	0.0180361	0.531499	F(1,2248)=1.101
			SMC6_5001092_pDONR221	0.133151	0.44637	0.1541	0.861485	F(1,2248)=2.207
			PARP1_1400_pDONR221	0.128844	0.439994	0.196026	0.875657	F(1,2248)=2.257
			XRN2_300900_pDONR221	0.283267	0.439994	0.180474	0.875657	F(1,2248)=2.257
			RBBP8_200800_pDONR221	0.283267	0.433617	0.102821	0.889934	F(1,2248)=2.308
			BRCA1_1_500_pDONR221	0.128844	0.433617	0.221631	0.547805	F(1,2248)=1.152
			DIS3L2_300886_pDONR221	0.16202	0.433617	0.0901804	0.547805	F(1,2248)=1.152
			PROKR1	0.124647	0.433617	0.299366	0.889934	F(1,2248)=2.308
			LRIG1	0.124647	0.428515	0.0979942	0.790432	F(1,2248)=1.957
			PAN2_1600_pDONR221	0.124647	0.42724	0.247381	0.904318	F(1,2248)=2.360
			RFC1_5001140_pDONR221	0.120557	0.42724	0.376442	0.904318	F(1,2248)=2.360
			XPC	0.272703	0.42724	0.327952	0.904318	F(1,2248)=2.360
			SLX4_1_500_pDONR221	0.272703	0.420863	0.3254	0.918807	F(1,2248)=2.412
			FAN1_6001018_pDONR221	0.112693	0.420863	0.0312394	0.564311	F(1,2248)=1.204
			EXO1_200600_pDONR221	0.262411	0.420863	0.124958	0.564311	F(1,2248)=1.204
			RNF20_1500_pDONR221	0.262411	0.40811	0.252505	0.948103	F(1,2248)=2.518
			CNOT1_1000_1500_pDONR221	0.112693	0.40811	0.06503	0.581017	F(1,2248)=1.257
			MMS19_5001031_pDONR221	0.262411	0.40811	0.0180361	0.581017	F(1,2248)=1.257
			RAD50_500_1000_pDONR221	0.262411	0.40811	0.267518	0.948103	F(1,2248)=2.518
			BARD1_400778_pDONR221	0.262411	0.40811	0.26012	0.581017	F(1,2248)=1.257
			GEN1_300909_pDONR221	0.146009	0.40811	0.126253	0.581017	F(1,2248)=1.257
			POLK_1500_pDONR221	0.108915	0.40811	0.160308	0.581017	F(1,2248)=1.257
			SPIDR_1500_pDONR221	0.108915	0.405559	0.294977	0.835619	F(1,2248)=2.115
			MSH6_700_1361_pDONR221	0.140951	0.401733	0.137507	0.962911	F(1,2248)=2.572
			PAPD7	0.105239	0.401733	0.246722	0.962911	F(1,2248)=2.572
			BRCC3	0.105239	0.397907	0.0858942	0.850933	F(1,2248)=2.169
			PRKDC_3700_4129_pDONR221	0.101661	0.395357	0.095438	0.977825	F(1,2248)=2.626
			SLX4_1000_1500_pDONR221	0.131238	0.395357	0.167745	0.977825	F(1,2248)=2.626
			XRN2_1600_pDONR221	0.0981806	0.38898	0.115663	0.992846	F(1,2248)=2.681
			MSH2_1500_pDONR221	0.242641	0.382603	0.268368	0.88194	F(1,2248)=2.279
			PAPD7	0.0947961	0.382603	0.0883584	1.00797	F(1,2248)=2.737
			MDC1_700_1100_pDONR221	0.0915057	0.382603	0.0826517	0.615036	F(1,2248)=1.366
			TONSL_500_1000_pDONR221	0.0915057	0.376226	0.159927	1.02321	F(1,2248)=2.793
			UVSSA_1600_pDONR221	0.233158	0.36985	0.187002	1.03855	F(1,2248)=2.850
			PMS2_400863_pDONR221	0.233158	0.36985	0.200841	1.03855	F(1,2248)=2.850
			INO80_1000_1557_pDONR221	0.164268	0.36985	0.06503	0.632349	F(1,2248)=1.422
			FANCB_1500_pDONR221	0.0883077	0.36985	0.308201	0.632349	F(1,2248)=1.422
			USP47_600_1300_pDONR221	0.0852003	0.363473	0.236627	0.784448	F(1,2248)=1.936
			WRN_800_1200_pDONR221	0.0852003	0.363473	0.0788757	1.054	F(1,2248)=2.907
			BRCA1	0.223941	0.357096	0.12817	1.06956	F(1,2248)=2.965
			ZFYVE26_1000_1500_pDONR221	0.223941	0.357096	0.100421	1.06956	F(1,2248)=2.965
			MMS22L_6001200_pDONR221	0.223941	0.357096	0.095438	0.649865	F(1,2248)=1.480
			ERCC3_300783_pDONR221	0.113377	0.357096	0.172053	0.649865	F(1,2248)=1.480
			MRE11A_1500_pDONR221	0.0821819	0.357096	0.208002	0.649865	F(1,2248)=1.480
			MSH4_1500_pDONR221	0.0821819	0.351995	0.194188	0.945475	F(1,2248)=2.508
			PMS_400933_pDONR221	0.0792508	0.35072	0.104586	1.08522	F(1,2248)=3.024
			PRKDC_2900_3500_pDONR221	0.214988	0.35072	0.2268	1.08522	F(1,2248)=3.024
			SMG1_2000_2500_pDONR221	0.214988	0.344343	0.103609	1.101	F(1,2248)=3.083
			MCM8_300881_pDONR221	0.0792508	0.344343	0.0541083	0.667586	F(1,2248)=1.538
			DDB1_1500_pDONR221	0.214988	0.344343	0.330607	0.667586	F(1,2248)=1.538
			REC8	0.0792508	0.344343	0.265994	1.101	F(1,2248)=3.083
			MLH3_1_500_pDONR221	0.109225	0.344343	0.136169	0.667586	F(1,2248)=1.538
			PAN3_1548_pDONR221	0.0764051	0.344343	0.0698535	1.101	F(1,2248)=3.083
			PAN3_300888_pDONR221	0.0736433	0.344343	0.224403	0.961677	F(1,2248)=2.567
			USP7_50550_pDONR221	0.0736433	0.337966	0.216902	1.11688	F(1,2248)=3.143
			SIRT1_150600_pDONR221	0.0736433	0.331589	0.25443	1.13287	F(1,2248)=3.203
			TP53BP1_900_1400_pDONR221	0.0736433	0.331589	0.0786175	1.13287	F(1,2248)=3.203
			PMS2_1400_pDONR221	0.0709637	0.331589	0.214925	1.13287	F(1,2248)=3.203
			POLD1_1520_pDONR221	0.0709636	0.331589	0.233426	1.13287	F(1,2248)=3.203
			WRN_600_1100_pDONR221	0.0709637	0.325213	0.14273	1.14896	F(1,2248)=3.264
			USP7_5401102_pDONR221	0.19786	0.325213	0.0904056	1.14896	F(1,2248)=3.264
			MNAT1	0.19786	0.325213	0.307474	1.14896	F(1,2248)=3.264
			FAN1_multi_domain_pDONR221	0.19786	0.318836	0.095438	0.703642	F(1,2248)=1.659
			FANCA_1_500_pDONR221	0.0683644	0.318836	0.118271	0.703642	F(1,2248)=1.659
			INO80_500_1000_pDONR221	0.19786	0.318836	0.0360722	0.703642	F(1,2248)=1.659
			SLX4_1400_1835_pDONR221	0.0658439	0.318836	0.1541	1.16517	F(1,2248)=3.325
			MCM8_200600_pDONR221	0.0610323	0.318836	0.126253	0.703642	F(1,2248)=1.659
			RDH14	0.0610323	0.312459	0.0677854	1.18148	F(1,2248)=3.387
			SIRT1_1500_pDONR221	0.0587379	0.299706	0.0998114	1.21444	F(1,2248)=3.513
			ZFYVE26_2000_2540_pDONR221	0.0587379	0.299706	0.167381	1.21444	F(1,2248)=3.513
			PAN2_6001200_pDONR221	0.0834288	0.293329	0.0845967	1.23108	F(1,2248)=3.576
			RNF20_500976_pDONR221	0.0834288	0.293329	0.124305	1.23108	F(1,2248)=3.576
			PARP2	0.119664	0.290778	0.27119	1.07868	F(1,2248)=2.999
			POLK_200871_pDONR221	0.0565155	0.290778	0.215891	1.07868	F(1,2248)=2.999
			SPIDR_200600_pDONR221	0.0543635	0.286952	0.154232	0.922038	F(1,2248)=2.424
			SETD2_500_1000_pDONR221	0.174072	0.286952	0.219511	1.24783	F(1,2248)=3.641
			WRN_1_500_pDONR221	0.174072	0.280576	0.0360722	1.26469	F(1,2248)=3.705
			ERCC2_1500_pDONR221	0.0543635	0.280576	0.109709	0.75927	F(1,2248)=1.849
			MCM9_300900_pDONR221	0.0522803	0.280576	0.0786175	0.75927	F(1,2248)=1.849
			SMC6_1500_pDONR221	0.0522803	0.280576	0.0570351	1.26469	F(1,2248)=3.705
			MSH3_5001138_pDONR221	0.0522803	0.274199	0.0921872	1.28166	F(1,2248)=3.771
			MSH6_1_520_pDONR221	0.0483136	0.274199	0.13512	1.28166	F(1,2248)=3.771
			XPC_1500_pDONR221	0.0483136	0.274199	0.113534	1.28166	F(1,2248)=3.771
			WRN_900_1433_pDONR221	0.0483136	0.261445	0.161446	1.31593	F(1,2248)=3.903
			SETD2_1_500_pDONR221	0.046427	0.261445	0.202956	1.31593	F(1,2248)=3.903
			SETD2_1500_2000_pDONR221	0.159444	0.261445	0.0514107	1.31593	F(1,2248)=3.903
			NBN_1500_pDONR221	0.046427	0.255069	0.06503	1.33323	F(1,2248)=3.970
			FANCB_200600_pDONR221	0.0682125	0.255069	0.0901804	0.797393	F(1,2248)=1.981
			RFC1_1500_pDONR221	0.0446027	0.255069	0.185693	1.33323	F(1,2248)=3.970
			XAB2_300856_pDONR221	0.0446027	0.252518	0.165185	1.16614	F(1,2248)=3.329
			SMG1_3000_3600_pDONR221	0.152487	0.248692	0.0614948	1.35064	F(1,2248)=4.038
			TP53BP1_400_900_pDONR221	0.152487	0.248692	0.0653419	1.35064	F(1,2248)=4.038
			EXO1_300847_pDONR221	0.152487	0.242315	0.190876	0.816767	F(1,2248)=2.049
			HUWE1_1000_1500_pDONR221	0.0411351	0.242315	0.1541	0.816767	F(1,2248)=2.049
			HUWE1_2500_3000_pDONR221	0.0411351	0.242315	0.13006	0.816767	F(1,2248)=2.049
			SMG_500_1000_pDONR221	0.0411351	0.235939	0.186676	1.38579	F(1,2248)=4.175
			POLN_200800_pDONR221	0.0411351	0.235939	0.148866	1.38579	F(1,2248)=4.175
			RBBP8_1500_pDONR221	0.0394886	0.235939	0.109152	1.38579	F(1,2248)=4.175
			SMC5_5001102_pDONR221	0.0394886	0.235939	0.20175	1.38579	F(1,2248)=4.175
			RAD54L_1500_pDONR221	0.0394886	0.229562	0.149819	1.40353	F(1,2248)=4.245
			SMG1_1200_1800_pDONR221	0.036363	0.229562	0.163821	1.40353	F(1,2248)=4.245
			MTOR_1500_2000_pDONR221	0.0348809	0.229562	0.187436	1.40353	F(1,2248)=4.245
			RBBP8_400903_pDONR221	0.0348809	0.216808	0.167745	1.43934	F(1,2248)=4.385
			ZFYVE26_1_500_pDONR221	0.0779197	0.210432	0.0724256	1.45741	F(1,2248)=4.456
			MSH6_360_900_pDONR221	0.0294569	0.210432	0.219511	1.45741	F(1,2248)=4.456
			XAB2_1500_pDONR221	0.12112	0.191302	0.10478	1.10835	F(1,2248)=3.111
			MTOR_2000_2500_pDONR221	0.0282201	0.184925	0.138684	1.53081	F(1,2248)=4.747
			LIG3_300900_pDONR221	0.0270283	0.178548	0.118271	0.916785	F(1,2248)=2.405
			SPIDR_300800_pDONR221	0.110085	0.178548	0.095438	1.54944	F(1,2248)=4.821
			TONSL_1_500_pDONR221	0.021699	0.172171	0.0724256	1.56818	F(1,2248)=4.895
			LIG4_500920_pDONR221	0.0356341	0.153041	0.0312394	0.958272	F(1,2248)=2.555
			SMG1_1_500_pDONR221	0.0207504	0.140288	0.0721443	1.66356	F(1,2248)=5.277
			USP47_600_1000_pDONR221	0.0198382	0.137737	0.109828	1.44813	F(1,2248)=4.420
			TONSL_900_1379_pDONR221	0.0189611	0.133911	0.0981683	1.68297	F(1,2248)=5.355
			PRKDC_1500_2000_pDONR221	0.0189611	0.127534	0.0525838	1.7025	F(1,2248)=5.434
			SMC5_1500_pDONR221	0.0143771	0.121158	0.0408309	1.72214	F(1,2248)=5.513
			RAD54L_150700_pDONR221	0.0736607	0.121158	0.0867328	1.72214	F(1,2248)=5.513
			PARP1_4001015_pDONR221	0.139018	0.0828973	0.0343397	1.84233	F(1,2248)=6.001
			LIG4_1600_pDONR221	0.295665	0.0510137	0.0180361	1.13276	F(1,2248)=3.202
			MLH1_1400_pDONR221	0.295665	0.0382603	0	0.856928	F(1,2248)=2.190
			AP5Z1_200600_pDONR221		0.0382603	0	0.529199	F(1,2248)=1.094
			EXO1_1500_pDONR221		0.0382603	0	0.529199	F(1,2248)=1.094
	Cell line	Comparison	Fusion	p value	% GFP, normalized to cell culture plate mean	SD	-LOG10(p)	dfs and F
	HEK293T	Screen 1 and Screen 2	eGFP only (positive control 1)	2.617e-17	3.48916	0.247442	16.5822	F(1,2134)=72.846
	GFP-BFP-sgRNA	(plate-normalized data points):	WTCas9 (different plasmid backbone than rest of the constructs, positive control 2)	8.732e-07	2.46289	0.633252	6.05889	F(1,2134)=24.333
		one-way Anova	WTCas9	1.179e-06	2.44564	0.193599	5.92849	F(1,2134)=23.748
		(mean of each replicate group to the	ERCC2_300761_pDONR221	0.00014436	2.13619	0.113871	3.84055	F(1,2134)=14.497
		mean of all other replicate groups)	SPIDR_400916_pDONR221	1.641e-07	2.10494	0.874773	6.78489	F(1,2134)=27.599
		n=6	RAD50_900_1300_pDONR221	0.00018322	1.97131	0.394435	3.73703	F(1,2134)=14.045
			Cas9WT	0.00147542	1.95421	0.281851	2.83108	F(1,2134)=10.135
			GTF2H2D	0.00223524	1.91831	0.0696021	2.65068	F(1,2134)=9.368
			GTF2H1	0.00014166	1.88519	0.329676	3.84875	F(1,2134)=14.533
			PMS1_1500_pDONR221	3.502e-05	1.87842	1.17942	4.45568	F(1,2134)=17.197
			phage T7_6_pDONR221	0.00824788	1.79645	0.0568692	2.08366	F(1,2134)=6.992
			GW_Halo	0.0096411	1.7808	0.0614205	2.01587	F(1,2134)=6.712
			MSH2_300934_pDONR221	0.0012493	1.75411	1.36616	2.90333	F(1,2134)=10.444
			PALB2_1500_pDONR221	0.00050653	1.74172	1.09903	3.29539	F(1,2134)=12.129
			POLE2	0.00058761	1.73344	0.330905	3.23091	F(1,2134)=11.850
			GenEZ ORF Clone: OHu20078C	0.0154842	1.73159	0.16349	1.81011	F(1,2134)=5.870
			HUWE1_3000_3500_pDONR221	0.0167641	1.72307	0.407005	1.77562	F(1,2134)=5.730
			RFC4	0.00076514	1.71849	0.501152	3.11626	F(1,2134)=11.357
			POLR2H	0.0007986	1.71604	0.16907	3.09767	F(1,2134)=11.277
			CCNH	0.00082136	1.71443	0.149431	3.08547	F(1,2134)=11.224
			GenEZ ORF Clone: OHu55904C	0.0184198	1.71286	0.1285	1.73472	F(1,2134)=5.564
			KIAA0146	0.0217685	1.69445	0.229989	1.66217	F(1,2134)=5.272
			XPC_400940_pDONR221	0.00814068	1.69336	0.384648	2.08934	F(1,2134)=7.015
			E_coli_recD_pDONR221	0.0237131	1.68486	0.0877413	1.62501	F(1,2134)=5.123
			ATXN3_HUM_FL_pDONR221	0.0248568	1.67954	0.0683934	1.60455	F(1,2134)=5.041
			MSH4_300937_pDONR221	0.00209379	1.65872	0.762126	2.67907	F(1,2134)=9.489
			MMS19_1500_pDONR221	0.0333096	1.64567	0.31292	1.47743	F(1,2134)=4.536
			HMGB2	0.00299632	1.63624	0.427344	2.52341	F(1,2134)=8.830
			FEN1	0.0391791	1.62627	0.122803	1.40695	F(1,2134)=4.258
			SETD2_1000_1500_pDONR221	0.0042941	1.61293	0.827615	2.36713	F(1,2134)=8.173
			GenEZ ORF Clone: OHu27390C	0.101872	1.60922	0.0442238	0.991945	F(1,2134)=2.678
			RPA2	0.00470478	1.60689	0.331049	2.32746	F(1,2134)=8.006
			CNOT1_1800_2350_pDONR221	0.0470829	1.60372	0.257823	1.32714	F(1,2134)=3.947
			TP53BP1_1400_1978_pDONR221	0.00496859	1.60326	0.377537	2.30377	F(1,2134)=7.907
			GenEZ ORF Clone: OHu09979C	0.106919	1.60071	0.0275246	0.970947	F(1,2134)=2.601
			Cas9WT	0.00580482	1.5928	0.925064	2.23621	F(1,2134)=7.625
			ZRANB3	0.0119573	1.59192	0.38508	1.92237	F(1,2134)=6.328
			CDC45	0.00596799	1.59092	0.222484	2.22417	F(1,2134)=7.575
			POLD2	0.00637228	1.58645	0.384799	2.19571	F(1,2134)=7.457
			HMGB1	0.00641707	1.58597	0.387836	2.19266	F(1,2134)=7.444
			NBN_200754_pDONR221	0.0270421	1.58269	0.212794	1.56796	F(1,2134)=4.895
			GenEZ ORF Clone: OHu31768C	0.121935	1.57712	0.012118	0.913872	F(1,2134)=2.394
			MDC1_1100_1700_pDONR221	0.0601925	1.57252	0.129847	1.22046	F(1,2134)=3.536
			XRN2	0.00857211	1.56585	0.598707	2.06691	F(1,2134)=6.923
			GenEZ ORF Clone: OHu24336C	0.0642204	1.56407	0.257438	1.19233	F(1,2134)=3.428
			ZFYVE26_1500_2000_pDONR221	0.00883971	1.56368	0.448828	2.05356	F(1,2134)=6.868
			POLD1_5801134_pDONR221	0.00963363	1.55756	0.45646	2.01621	F(1,2134)=6.714
			phage_T5_D15_pDONR221	0.0701662	1.55237	0.0989179	1.15387	F(1,2134)=3.282
			PALB2_5001100_pDONR221	0.0129171	1.53626	0.744871	1.88883	F(1,2134)=6.191
			RAD51D	0.0164169	1.51831	0.230144	1.78471	F(1,2134)=5.767
			RAD50_1_500_pDONR221	0.0188298	1.5078	0.536173	1.72515	F(1,2134)=5.526
			SMC6_5001092_pDONR221	0.0200682	1.50286	0.587158	1.69749	F(1,2134)=5.414
			BRCA2_1_500_pDONR221	0.108907	1.49131	0.540095	0.962943	F(1,2134)=2.572
			RPA4/SNAP control	0.0233148	1.49106	0.345576	1.63237	F(1,2134)=5.152
			DNA2/SNAP control	0.0234824	1.49049	0.445744	1.62926	F(1,2134)=5.140
			LIG4_300912_pDONR221	0.111613	1.48774	0.332514	0.952283	F(1,2134)=2.533
			DCLRE1C	0.0276606	1.47733	0.20044	1.55814	F(1,2134)=4.856
			OBFC2B	0.0327199	1.46351	0.14249	1.48519	F(1,2134)=4.566
			SWI5_HUM_FL_pDONR221	0.136838	1.45737	0.224959	0.863795	F(1,2134)=2.215
			RAD51AP1	0.0387685	1.44921	0.19694	1.41152	F(1,2134)=4.276
			GW_eDHFR	0.15069	1.4425	0.26165	0.821915	F(1,2134)=2.067
			MLH1_1400_pDONR221	0.151236	1.44193	0.60286	0.820344	F(1,2134)=2.061
			Cas9WT	0.158368	1.4347	0.319339	0.800334	F(1,2134)=1.991
			TCEA1/SNAP control	0.0496392	1.42771	0.316354	1.30418	F(1,2134)=3.858
			SHFM1	0.0526649	1.42243	0.234539	1.27848	F(1,2134)=3.759
			POLR2I	0.056097	1.41675	0.101738	1.25106	F(1,2134)=3.653
			SMC6	0.0561189	1.41671	0.291104	1.25089	F(1,2134)=3.653
			CCDC155	0.0575604	1.41441	0.228521	1.23988	F(1,2134)=3.610
			CCNH	0.059651	1.41116	0.161808	1.22438	F(1,2134)=3.551
			PRKDC_2000_2500_pDONR221	0.130453	1.40492	0.675451	0.884546	F(1,2134)=2.289
			DDB2	0.0739847	1.39108	0.386401	1.13086	F(1,2134)=3.195
			CCNH	0.0783663	1.38559	0.228334	1.10587	F(1,2134)=3.101
			GenEZ ORF Clone: OHu23325C	0.215158	1.38439	0.140676	0.667243	F(1,2134)=1.537
			TREX1	0.0867703	1.37571	0.197266	1.06163	F(1,2134)=2.936
			RAD51AP1	0.094152	1.36765	0.103093	1.02617	F(1,2134)=2.804
			FANCE	0.0974486	1.36422	0.231752	1.01122	F(1,2134)=2.749
			MORF4L1	0.099681	1.36194	0.233364	1.00139	F(1,2134)=2.713
			SMC5	0.103166	1.35847	0.279173	0.986464	F(1,2134)=2.658
			GenEZ ORF Clone: OHu22165C	0.257763	1.35268	0.073722	0.588779	F(1,2134)=1.281
			ALKBH1	0.260031	1.3511	0.150184	0.584975	F(1,2134)=1.269
			SETD2_2000_2500_pDONR221	0.196004	1.34909	1.11023	0.707734	F(1,2134)=1.673
			RAD51AP1	0.113491	1.34871	0.292829	0.945038	F(1,2134)=2.507
			UBE2I	0.114556	1.34774	0.294793	0.940982	F(1,2134)=2.492
			XRN2_300900_pDONR221	0.117129	1.34543	0.707763	0.931335	F(1,2134)=2.457
			GW_SNAP	0.280879	1.33699	0.0674579	0.55148	F(1,2134)=1.163
			RFC5	0.130893	1.33373	0.337346	0.883085	F(1,2134)=2.284
			Cas9WT	0.134961	1.33045	0.671463	0.86979	F(1,2134)=2.236
			E_coli_exoX_pDONR221	0.224181	1.32934	0.137485	0.649402	F(1,2134)=1.478
			SPIDR_1500_pDONR221	0.293508	1.32879	0.760866	0.53238	F(1,2134)=1.104
			DNA2_80520_pDONR221	0.294328	1.32826	0.756646	0.531168	F(1,2134)=1.100
			BLM_600_1100_pDONR221	0.299915	1.32471	0.106797	0.523002	F(1,2134)=1.075
			ATM_1960_2566_pDONR221	0.301085	1.32398	0.117582	0.521311	F(1,2134)=1.070
			SLX4_1000_1500_pDONR221	0.151667	1.31774	0.646598	0.81911	F(1,2134)=2.057
			LIG1	0.193402	1.31597	0.145375	0.71354	F(1,2134)=1.693
			RFC1	0.195939	1.31429	0.273826	0.707878	F(1,2134)=1.673
			ERCC6_1000_1494_pDONR221	0.323569	1.31016	0.24537	0.490033	F(1,2134)=0.975
			LIG4	0.167332	1.30677	0.228696	0.776422	F(1,2134)=1.908
			XRCC3_HUM_FL_pDONR221	0.261839	1.30555	0.191809	0.581966	F(1,2134)=1.260
			APLF	0.173721	1.30251	0.511107	0.760148	F(1,2134)=1.852
			BRCA2_500_1000_pDONR221	0.346171	1.29689	0.310144	0.460709	F(1,2134)=0.888
			HELQ_1500_pDONR221	0.349257	1.29513	0.287219	0.456855	F(1,2134)=0.877
			PIAS1	0.185331	1.29506	0.151391	0.732051	F(1,2134)=1.755
			GenEZ ORF Clone: OHu22043C	0.350995	1.29413	0.0314738	0.4547	F(1,2134)=0.870
			SLX1B	0.188019	1.29339	0.297679	0.725799	F(1,2134)=1.734
			MMS19_300800_pDONR221	0.366987	1.28515	0.375909	0.435349	F(1,2134)=0.814
			MSH6_700_1361_pDONR221	0.210917	1.2798	0.388979	0.675889	F(1,2134)=1.566
			SNAP control	0.213334	1.27843	0.418449	0.670941	F(1,2134)=1.550
			RBBP8	0.215503	1.2772	0.10494	0.666547	F(1,2134)=1.535
			Cas9WT	0.220193	1.27459	0.476376	0.657197	F(1,2134)=1.504
			POLR2K_HUM_FL_pDONR221	0.318828	1.27367	0.444736	0.496444	F(1,2134)=0.994
			MCM8	0.222788	1.27317	0.133522	0.652108	F(1,2134)=1.487
			POLD3	0.224771	1.27208	0.492316	0.648259	F(1,2134)=1.475
			XRCC2	0.227307	1.27071	0.150748	0.643387	F(1,2134)=1.458
			SFPQ	0.274591	1.26859	0.268994	0.561313	F(1,2134)=1.194
			C_jej_1057c_pDONR221	0.399194	1.26778	0.0872279	0.398816	F(1,2134)=0.711
			SIRT6	0.232817	1.26776	0.130715	0.632985	F(1,2134)=1.424
			TONSL_500_1000_pDONR221	0.233343	1.26748	0.571696	0.632005	F(1,2134)=1.421
			DCLRE1A_1500_pDONR221	0.404461	1.26502	0.374352	0.393123	F(1,2134)=0.695
			XRN2_1600_pDONR221	0.239695	1.26415	0.319345	0.62034	F(1,2134)=1.383
			CHEK1	0.284498	1.26352	0.336164	0.545921	F(1,2134)=1.146
			AEN	0.244147	1.26185	0.297956	0.612349	F(1,2134)=1.357
			SIRT6	0.254923	1.2564	0.195218	0.593592	F(1,2134)=1.297
			RBBP8_200800_pDONR221	0.356132	1.25479	0.212662	0.448388	F(1,2134)=0.852
			PALB2	0.303955	1.25389	0.521016	0.517191	F(1,2134)=1.057
			ERCC3_40700_pDONR221	0.44802	1.24296	0.394559	0.348703	F(1,2134)=0.576
			PNKP	0.302849	1.23393	0.210492	0.518774	F(1,2134)=1.062
			RFC3	0.312097	1.22987	0.213922	0.50571	F(1,2134)=1.022
			UVSSA_1600_pDONR221	0.319702	1.22659	0.589199	0.495254	F(1,2134)=0.991
			SETD2_2000_2500_pDONR221	0.4826	1.22631	0.0766421	0.316413	F(1,2134)=0.493
			phage T7_3_pDONR221	0.483465	1.22591	0.0248331	0.315635	F(1,2134)=0.491
			MLST8	0.32231	1.22548	0.162608	0.491726	F(1,2134)=0.980
			DCLRE1B	0.328767	1.22276	0.385816	0.483111	F(1,2134)=0.954
			APEX1	0.35445	1.21224	0.168667	0.450445	F(1,2134)=0.858
			KIAA0146/SNAP control	0.398839	1.21192	0.177355	0.399202	F(1,2134)=0.712
			PRKDC_1000_1500_pDONR221	0.361498	1.20943	0.459236	0.441894	F(1,2134)=0.833
			MSH4	0.370803	1.20579	0.378011	0.430856	F(1,2134)=0.801
			TP53	0.376242	1.20368	0.324403	0.424533	F(1,2134)=0.783
			MTOR_1000_1500_pDONR221	0.532318	1.20347	0.306567	0.273829	F(1,2134)=0.390
			APTX	0.382398	1.20132	0.128133	0.417484	F(1,2134)=0.763
			PRKDC_3700_4129_pDONR221	0.478153	1.20041	0.302669	0.320433	F(1,2134)=0.503
			CNOT1_260_685_pDONR221	0.540599	1.19977	0.367251	0.267125	F(1,2134)=0.375
			ATR_2100_2645_pDONR221	0.542756	1.19881	0.134343	0.265395	F(1,2134)=0.371
			MSH3_1500_pDONR221	0.502049	1.19073	0.397815	0.299254	F(1,2134)=0.451
			MMS22L1_1600_pDONR221	0.564849	1.1891	0.435935	0.248068	F(1,2134)=0.331
			UBQLN4	0.425953	1.18524	0.229574	0.370639	F(1,2134)=0.634
			SLC30A9	0.430426	1.18365	0.620969	0.366101	F(1,2134)=0.622
			phage T5_12_pDONR221	0.521992	1.18284	0.0782765	0.282336	F(1,2134)=0.410
			M_avi_recC_pDONR221	0.527695	1.18061	0.303333	0.277617	F(1,2134)=0.399
			RNF20	0.453861	1.17544	0.126668	0.343077	F(1,2134)=0.561
			POLR2J	0.473768	1.16866	0.0681229	0.324434	F(1,2134)=0.513
			WRN_800_1200_pDONR221	0.481028	1.16622	0.166732	0.317829	F(1,2134)=0.497
			BARD1_1500_pDONR221	0.61915	1.16598	0.14795	0.208204	F(1,2134)=0.247
			RAD51B	0.493696	1.16202	0.260117	0.306541	F(1,2134)=0.469
			ZFYVE26_1000_1500_pDONR221	0.495715	1.16136	0.342408	0.304768	F(1,2134)=0.464
			GTF2H4	0.534918	1.16108	0.289109	0.271713	F(1,2134)=0.385
			DCLRE1A	0.556482	1.14199	0.374635	0.254549	F(1,2134)=0.346
			MSH2_1500_pDONR221	0.68011	1.14104	0.346157	0.167421	F(1,2134)=0.170
			RAD23A	0.564943	1.13938	0.18327	0.247995	F(1,2134)=0.331
			GenEZ ORF Clone: OHu22734C	0.692106	1.13624	0.0805395	0.159827	F(1,2134)=0.157
			DIS3L2_1500_pDONR221	0.660544	1.1316	0.136787	0.180099	F(1,2134)=0.193
			BRCA2_3000_3419_pDONR221	0.731507	1.12068	0.153394	0.135781	F(1,2134)=0.118
			PAN2_1600_pDONR221	0.634125	1.11867	0.464548	0.197825	F(1,2134)=0.227
			PAN3_1548_pDONR221	0.664468	1.1099	0.154468	0.177526	F(1,2134)=0.188
			MRE11A_300708_pDONR221	0.761753	1.10893	0.00326711	0.118186	F(1,2134)=0.092
			USP47	0.676599	1.10644	0.260703	0.169668	F(1,2134)=0.174
			KIAA1530	0.680254	1.1054	0.181426	0.167329	F(1,2134)=0.170
			ISG20	0.683343	1.10453	0.146698	0.165361	F(1,2134)=0.166
			RAD50_900_1300_pDONR221	0.773338	1.10447	0.132733	0.111631	F(1,2134)=0.083
			M_avi_1792_pDONR221	0.752223	1.10015	0.152588	0.123653	F(1,2134)=0.100
			SMUG1	0.711648	1.09657	0.0700734	0.147735	F(1,2134)=0.137
			HUWE1_2000_2500_pDONR221	0.812055	1.08968	0.362329	0.0904143	F(1,2134)=0.057
			MLH3_500_1000_pDONR221	0.812055	1.08968	0.362329	0.0904143	F(1,2134)=0.057
			GW_Streptavidin	0.813705	1.08906	0.15252	0.0895331	F(1,2134)=0.056
			Cas9WT	0.753976	1.08488	0.676711	0.122643	F(1,2134)=0.098
			LIG3_5001010_pDONR221	0.827247	1.08393	0.23749	0.0823649	F(1,2134)=0.048
			GenEZ ORF Clone: OHu18192C	0.830235	1.0828	0.0280352	0.0807992	F(1,2134)=0.046
			MMS22L/SNAP control	0.765973	1.0816	0.178775	0.115787	F(1,2134)=0.089
			REXO2	0.767222	1.08126	0.295374	0.115079	F(1,2134)=0.088
			POLR2F	0.768028	1.08104	0.147845	0.114623	F(1,2134)=0.087
			E_coli_orn_pDONR221	0.81343	1.07984	0.199474	0.0896797	F(1,2134)=0.056
			SIRT1_150600_pDONR221	0.776696	1.07869	0.803557	0.109749	F(1,2134)=0.080
			Cas9WT/eDHFR	0.776925	1.07863	0.514022	0.109621	F(1,2134)=0.080
			POLK	0.779992	1.07779	0.189269	0.10791	F(1,2134)=0.078
			RNF8	0.785417	1.07633	0.118894	0.1049	F(1,2134)=0.074
			ERCC6_1_500_pDONR221	0.848117	1.07607	0.0986548	0.0715441	F(1,2134)=0.037
			SFR1	0.786702	1.07598	0.184925	0.10419	F(1,2134)=0.073
			SMG1_2000_2500_pDONR221	0.792309	1.07446	0.405565	0.101105	F(1,2134)=0.069
			XPC_multi_domain_pDONR221	0.842264	1.07042	0.0682424	0.0745515	F(1,2134)=0.040
			SLX4_600_1000_pDONR221	0.871275	1.0674	0.0234577	0.0598448	F(1,2134)=0.026
			RAD23B	0.847802	1.05962	0.356125	0.0717055	F(1,2134)=0.037
			BLM_1_600_pDONR221	0.892208	1.05959	0.102881	0.049534	F(1,2134)=0.018
			BRCA1_1300_1885_pDONR221	0.892378	1.05953	0.539913	0.0494512	F(1,2134)=0.018
			DCLRE1A_4001041_pDONR221	0.897688	1.05755	0.166551	0.0468747	F(1,2134)=0.017
			MLH1	0.868355	1.05418	0.167459	0.0613029	F(1,2134)=0.027
			INO80	0.886579	1.05221	0.285124	0.0522826	F(1,2134)=0.020
			ZSWIM7	0.887147	1.05205	0.222402	0.0520043	F(1,2134)=0.020
			OGG1	0.877271	1.05182	0.14259	0.0568662	F(1,2134)=0.024
			PARP1_1400_pDONR221	0.909268	1.04875	0.384014	0.0413082	F(1,2134)=0.013
			HELQ	0.891281	1.04813	0.383227	0.0499853	F(1,2134)=0.019
			RNF20_1500_pDONR221	0.891776	1.048	0.161786	0.0497442	F(1,2134)=0.019
			HMGA1	0.897135	1.0466	0.163565	0.0471424	F(1,2134)=0.017
			POLR2A	0.89803	1.04636	0.0968945	0.0467092	F(1,2134)=0.016
			PCNA	0.901219	1.04552	0.0977631	0.0451698	F(1,2134)=0.015
			RAD50_500_1000_pDONR221	0.902229	1.04526	0.333547	0.0446831	F(1,2134)=0.015
			PAN3_200600_pDONR221	0.940748	1.04159	0.337967	0.0265267	F(1,2134)=0.006
			USP7_5401102_pDONR221	0.937542	1.03601	0.144271	0.0280095	F(1,2134)=0.006
			ERCC1	0.938715	1.0357	0.303731	0.0274661	F(1,2134)=0.006
			MCM8_1500_pDONR221	0.963231	1.03328	0.173536	0.0162695	F(1,2134)=0.002
			RAD1	0.955565	1.0313	0.118532	0.0197398	F(1,2134)=0.003
			GTF2H5	0.963638	1.02919	0.429058	0.0160863	F(1,2134)=0.002
			POLD4	0.96544	1.02872	0.164735	0.0152747	F(1,2134)=0.002
			LIG4_250920_pDONR221	0.985715	1.02498	0.196006	0.00624857	F(1,2134)=0.000
			S_aureus_nuc_pDONR221	0.986752	1.0246	0.0810184	0.00579202	F(1,2134)=0.000
			HMGA2	0.982536	1.02427	0.105288	0.00765157	F(1,2134)=0.000
			APEX1	0.998344	1.01928	0.193192	0.000719727	F(1,2134)=0.000
			GTF2H3	0.986663	1.01624	0.271341	0.00583134	F(1,2134)=0.000
			PAN3_300888_pDONR221	0.981048	1.0143	0.648424	0.00830988	F(1,2134)=0.001
			POLE2	0.968758	1.01157	0.192436	0.0137848	F(1,2134)=0.002
			ABL1_1500_pDONR221	0.970929	1.00899	0.0689466	0.0128124	F(1,2134)=0.001
			SLX4_1_500_pDONR221	0.954856	1.00794	0.293591	0.0200619	F(1,2134)=0.003
			MDC1_1700_2090_pDONR221	0.966558	1.00738	0.201697	0.0147719	F(1,2134)=0.002
			POLR2C	0.948308	1.00623	0.384241	0.0230505	F(1,2134)=0.004
			POLD1	0.936325	1.0031	0.203084	0.0285735	F(1,2134)=0.006
			BRCA2	0.934264	1.00092	0.364662	0.0295302	F(1,2134)=0.007
			INO80_1_526_pDONR221	0.948039	1.00054	0.440529	0.0231737	F(1,2134)=0.004
			AEN	0.910315	0.996293	0.142639	0.0408081	F(1,2134)=0.013
			TP53BP1_900_1400_pDONR221	0.907278	0.995496	0.287157	0.0422597	F(1,2134)=0.014
			DBB1_5001141_pDONR221	0.930323	0.993985	0.0519676	0.0313663	F(1,2134)=0.008
			HUWE1_500_1000_pDONR221	0.929946	0.993845	0.0896738	0.0315421	F(1,2134)=0.008
			HELQ_350720_pDONR221	0.927578	0.992968	0.209441	0.0326495	F(1,2134)=0.008
			USP7_50550_pDONR221	0.910628	0.991117	0.73468	0.0406588	F(1,2134)=0.013
			FANCA_700_1200_pDONR221	0.921536	0.99073	0.499614	0.0354877	F(1,2134)=0.010
			FAN1_1509_pDONR221	0.913575	0.987778	0.479398	0.039256	F(1,2134)=0.012
			SIRT1_1500_pDONR221	0.865301	0.984444	0.351902	0.0628329	F(1,2134)=0.029
			MLH1_200756_pDONR221	0.892591	0.979981	0.279712	0.0493476	F(1,2134)=0.018
			BRCA2_2000_2500_pDONR221	0.887526	0.978095	0.208185	0.0518188	F(1,2134)=0.020
			ERCC3_1500_pDONR221	0.882982	0.976402	0.333797	0.0540484	F(1,2134)=0.022
			RFC1_5001140_pDONR221	0.833726	0.976065	0.497943	0.0789766	F(1,2134)=0.044
			BRCA2_1500_2000_pDONR221	0.878711	0.974809	0.297788	0.0561541	F(1,2134)=0.023
			RAD51D/SNAP control	0.812811	0.970477	0.211798	0.0900104	F(1,2134)=0.056
			PMS2_400863_pDONR221	0.799476	0.966896	0.203602	0.0971943	F(1,2134)=0.065
			RAD51C	0.789355	0.964167	0.241823	0.102728	F(1,2134)=0.071
			ERCC6_500_1000_pDONR221	0.847461	0.96311	0.395175	0.0718804	F(1,2134)=0.037
			ALKBH1/eDHFR control/WT/empty	0.779872	0.961602	0.658595	0.107977	F(1,2134)=0.078
			ZFYVE26	0.756352	0.9552	0.292363	0.121276	F(1,2134)=0.096
			Cas9WT/eDHFR	0.775964	0.954879	0.46142	0.110159	F(1,2134)=0.081
			CDC7	0.741685	0.951177	0.219632	0.129781	F(1,2134)=0.109
			HUS1B	0.722055	0.945752	0.316607	0.14143	F(1,2134)=0.127
			PAN2_6001200_pDONR221	0.720694	0.945374	0.211922	0.142249	F(1,2134)=0.128
			PMS_400933_pDONR221	0.768815	0.944829	0.219285	0.114178	F(1,2134)=0.086
			CETN2_HUM_FL_pDONR221	0.762788	0.942817	0.193834	0.117596	F(1,2134)=0.091
			MDC1_1_500_pDONR221	0.789029	0.940979	0.318132	0.102907	F(1,2134)=0.072
			MLH3_1000_1454_pDONR221	0.787091	0.940238	0.0436519	0.103975	F(1,2134)=0.073
			EXO5_HUM_FL_pDONR221	0.749747	0.938448	0.348762	0.125085	F(1,2134)=0.102
			ATM_2600_3057_pDONR221	0.769213	0.933377	0.136065	0.113953	F(1,2134)=0.086
			FANCB_300860_pDONR221	0.767991	0.932906	0.713151	0.114644	F(1,2134)=0.087
			SLX4	0.702043	0.932557	0.246369	0.153636	F(1,2134)=0.146
			CCNO	0.667888	0.930505	0.174883	0.175297	F(1,2134)=0.184
			BRCA1_300_800_pDONR221	0.741287	0.922565	0.25849	0.130014	F(1,2134)=0.109
			HUWE1_1500_2000_pDONR221	0.738872	0.921624	0.167607	0.131431	F(1,2134)=0.111
			WRN_1_500_pDONR221	0.630399	0.919669	0.143239	0.200385	F(1,2134)=0.232
			SMC6_1500_pDONR221	0.628823	0.919207	0.169227	0.201472	F(1,2134)=0.234
			POLE	0.616554	0.915599	0.24144	0.210029	F(1,2134)=0.251
			MSH4_1500_pDONR221	0.643416	0.914249	0.473957	0.191508	F(1,2134)=0.214
			PARP1	0.608586	0.913239	0.284248	0.215678	F(1,2134)=0.262
			POLR2E	0.580018	0.904659	0.0860839	0.236558	F(1,2134)=0.306
			WRN_600_1100_pDONR221	0.578382	0.904162	0.243434	0.237785	F(1,2134)=0.309
			FANCL_HUM_FL_pDONR221	0.69453	0.904155	0.136529	0.158309	F(1,2134)=0.154
			UBE2N	0.610912	0.903805	0.135994	0.214021	F(1,2134)=0.259
			XPC_1500_pDONR221	0.570848	0.901864	0.357871	0.24348	F(1,2134)=0.321
			BARD1_200778_pDONR221	0.683218	0.899635	0.347705	0.165441	F(1,2134)=0.167
			MPG	0.545344	0.893974	0.154464	0.26333	F(1,2134)=0.366
			PRKDC_2900_3500_pDONR221	0.515777	0.884594	0.243223	0.287538	F(1,2134)=0.422
			ATR_1_500_pDONR221	0.64357	0.883558	0.0580174	0.191405	F(1,2134)=0.214
			FANCG	0.508514	0.882248	0.238816	0.293697	F(1,2134)=0.437
			E_coli_recE_pDONR221	0.640187	0.882168	0.0692601	0.193693	F(1,2134)=0.219
			XAB2_300856_pDONR221	0.638349	0.881412	0.492137	0.194942	F(1,2134)=0.221
			FANCC	0.502932	0.880433	0.39161	0.298491	F(1,2134)=0.449
			LIG3	0.501894	0.880095	0.195258	0.299388	F(1,2134)=0.451
			PMS1	0.494914	0.877807	0.113422	0.305471	F(1,2134)=0.466
			SLX4_1400_1835_pDONR221	0.469499	0.86933	0.262537	0.328366	F(1,2134)=0.523
			SETD2_500_1000_pDONR221	0.467636	0.868698	0.597464	0.330092	F(1,2134)=0.528
			DIS3L2_200600_pDONR221	0.604912	0.867482	0.159784	0.218308	F(1,2134)=0.268
			GenEZ ORF Clone: OHu21550C	0.60438	0.867258	0.10613	0.21869	F(1,2134)=0.269
			M_avi_1789_pDONR221	0.544061	0.86515	0.0800684	0.264353	F(1,2134)=0.368
			POLK_200871_pDONR221	0.487757	0.861637	0.587535	0.311797	F(1,2134)=0.482
			HELQ_7001101_pDONR221	0.589598	0.860989	0.351482	0.229444	F(1,2134)=0.291
			SLX4_600_1000_pDONR221	0.521434	0.856374	0.885504	0.282801	F(1,2134)=0.411
			MSH6_1_520_pDONR221	0.411421	0.848936	0.354591	0.385714	F(1,2134)=0.675
			E_coli_sbcB_pDONR221	0.501464	0.848464	0.183067	0.29976	F(1,2134)=0.452
			POLD1_1520_pDONR221	0.409436	0.84821	0.260182	0.387814	F(1,2134)=0.681
			EXOSC10_300886_pDONR221	0.559339	0.847923	0.108323	0.252325	F(1,2134)=0.341
				0.547791	0.842848	0.438202	0.261385	F(1,2134)=0.361
			WRN_900_1433_pDONR221	0.39326	0.842216	0.496826	0.40532	F(1,2134)=0.729
			FAM175A	0.391209	0.841446	0.369267	0.407591	F(1,2134)=0.735
			PMS2_1400_pDONR221	0.376044	0.83567	0.231487	0.424762	F(1,2134)=0.784
			RFC1_1500_pDONR221	0.366907	0.832122	0.599326	0.435444	F(1,2134)=0.814
			DNA2_5201061_pDONR221	0.519373	0.830126	0.282802	0.28452	F(1,2134)=0.415
			BRCA1_1_500_pDONR221	0.516431	0.828789	0.318436	0.286988	F(1,2134)=0.421
			EXO1_200600_pDONR221	0.515075	0.828171	0.224584	0.28813	F(1,2134)=0.424
			RNF20_500976_pDONR221	0.356151	0.827872	0.241215	0.448365	F(1,2134)=0.852
			POLK_1500_pDONR221	0.512012	0.826773	0.151693	0.29072	F(1,2134)=0.430
			Cas9WT	0.352798	0.826531	0.471093	0.452474	F(1,2134)=0.864
			RAD50_multi_domain_pDONR221	0.506234	0.824124	0.0054951	0.295649	F(1,2134)=0.442
			ATRIP	0.343493	0.822766	0.063091	0.464083	F(1,2134)=0.898
			FANCB	0.386765	0.822547	0.118982	0.412552	F(1,2134)=0.749
			FANCA_1000_1500_pDONR221	0.498652	0.820623	0.102708	0.302202	F(1,2134)=0.458
			HMGA1	0.336136	0.819744	0.0969159	0.473485	F(1,2134)=0.926
			MDC1_700_1100_pDONR221	0.49643	0.819592	0.0352798	0.304142	F(1,2134)=0.463
			E_coli_xseB_pDONR221	0.427607	0.817614	0.0692151	0.368956	F(1,2134)=0.630
			FAN1	0.328875	0.816719	0.259467	0.482969	F(1,2134)=0.954
			USP47_600_1300_pDONR221	0.489723	0.816464	0.424563	0.310049	F(1,2134)=0.477
			SMG1_3000_3600_pDONR221	0.317118	0.811727	0.216718	0.498779	F(1,2134)=1.001
			BRCA1	0.309986	0.808639	0.176873	0.508658	F(1,2134)=1.031
			NGLY1	0.309352	0.808363	0.314355	0.509547	F(1,2134)=1.034
			BLM_420_1000_pDONR221	0.472321	0.808238	0.0495684	0.325763	F(1,2134)=0.517
			SETD2_1500_2000_pDONR221	0.399977	0.805294	0.140135	0.397965	F(1,2134)=0.709
			POLN	0.344012	0.80415	0.21849	0.463426	F(1,2134)=0.896
			POLR2G	0.299239	0.803897	0.11121	0.523982	F(1,2134)=1.078
			POLL	0.290029	0.799742	0.157657	0.537558	F(1,2134)=1.120
			DIS3L2	0.284444	0.797179	0.148125	0.546003	F(1,2134)=1.146
			ATM	0.280634	0.795411	0.238327	0.551859	F(1,2134)=1.165
			USP7/Cas9WT	0.316617	0.791586	0.636764	0.499466	F(1,2134)=1.003
			POLR2C	0.269387	0.790094	0.0949529	0.569624	F(1,2134)=1.221
			EXOSC10_200600_pDONR221	0.434733	0.789876	0.241187	0.361777	F(1,2134)=0.610
			FANCB_1500_pDONR221	0.431288	0.788149	0.566284	0.365232	F(1,2134)=0.620
			ERCC1	0.260743	0.785904	0.260544	0.583788	F(1,2134)=1.265
			ZFYVE26_2000_2540_pDONR221	0.256801	0.783961	0.12329	0.590404	F(1,2134)=1.287
			TP53BP1_400_900_pDONR221	0.255481	0.783306	0.381012	0.592641	F(1,2134)=1.294
			SETD2_1_500_pDONR221	0.254562	0.782849	0.570293	0.594206	F(1,2134)=1.299
			GEN1	0.243438	0.777217	0.214294	0.613612	F(1,2134)=1.361
			CNOT6	0.238717	0.774772	0.212326	0.622116	F(1,2134)=1.389
			RBBP8_1500_pDONR221	0.227198	0.76866	0.333002	0.643596	F(1,2134)=1.459
			AP5Z1	0.226694	0.767519	0.308866	0.64456	F(1,2134)=1.462
			phage_T5_exo2_pDONR221	0.388901	0.766196	0.0394675	0.410161	F(1,2134)=0.743
			GenEZ ORF Clone: OHu21280C	0.379361	0.761059	0.146928	0.420947	F(1,2134)=0.773
			POLR2L	0.271984	0.759751	0.0869732	0.565456	F(1,2134)=1.207
			MMS22L_6001200_pDONR221	0.376696	0.759609	0.0970215	0.424009	F(1,2134)=0.782
			SMG_500_1000_pDONR221	0.121915	0.759222	0.570584	0.913942	F(1,2134)=2.394
			Cas9WT	0.356523	0.756514	0.609194	0.447912	F(1,2134)=0.850
			GenEZ ORF Clone: OHu19368C	0.368052	0.754865	0.171693	0.434091	F(1,2134)=0.811
			DIS3L2_300886_pDONR221	0.363851	0.752534	0.170227	0.439076	F(1,2134)=0.825
			HUWE1_1_500_pDONR221	0.349869	0.744652	0.235001	0.456095	F(1,2134)=0.874
			SWSAP1	0.234461	0.743512	0.155569	0.62993	F(1,2134)=1.414
			GEN1_300909_pDONR221	0.345105	0.741922	0.0861059	0.462049	F(1,2134)=0.892
			MRE11A_1500_pDONR221	0.340163	0.739063	0.300667	0.468313	F(1,2134)=0.910
			FAN1_6001018_pDONR221	0.335784	0.736508	0.159189	0.47394	F(1,2134)=0.927
			MSH3_5001138_pDONR221	0.259363	0.732391	0.196707	0.586093	F(1,2134)=1.273
			ERCC4	0.171873	0.731698	0.210343	0.764792	F(1,2134)=1.868
			GenEZ ORF Clone: OHu26186C	0.323449	0.729194	0.124951	0.490194	F(1,2134)=0.975
			SPIDR_200600_pDONR221	0.319103	0.726573	0.362701	0.496069	F(1,2134)=0.993
			NBN_1500_pDONR221	0.240391	0.720648	0.15892	0.619083	F(1,2134)=1.379
			POLR2D	0.211406	0.719308	0.0498307	0.674882	F(1,2134)=1.563
			ATR	0.229379	0.71141	0.266094	0.639447	F(1,2134)=1.446
			phage_T5_exo5_pDONR221	0.288934	0.7077	0.044582	0.539201	F(1,2134)=1.125
			POLN_200800_pDONR221	0.35406	0.706889	0.390661	0.450923	F(1,2134)=0.859
			RAD51	0.129649	0.70497	0.165936	0.887231	F(1,2134)=2.298
			ATM	0.121644	0.703202	0.160491	0.914909	F(1,2134)=2.398
			RAD54L_1500_pDONR221	0.255306	0.699937	0.38526	0.592939	F(1,2134)=1.295
			APEX2	0.187745	0.694956	0.199194	0.726431	F(1,2134)=1.736
			LIG4_multi_domain_pDONR221	0.199598	0.692972	0.0903819	0.699843	F(1,2134)=1.646
			SLX1A	0.206228	0.688729	0.168786	0.685652	F(1,2134)=1.599
			CNOT1_1000_1500_pDONR221	0.260154	0.688415	0.0201116	0.584769	F(1,2134)=1.269
			E_coli_xthA_pDONR221	0.193382	0.688403	0.0695539	0.713584	F(1,2134)=1.693
			E_coli_xseA_pDONR221	0.258618	0.687345	0.0764088	0.587341	F(1,2134)=1.277
			ZFYVE26_1_500_pDONR221	0.0856163	0.685949	0.244445	1.06744	F(1,2134)=2.958
			MCM8_300881_pDONR221	0.253345	0.68364	0.09434	0.596288	F(1,2134)=1.305
			ANTXR1	0.333717	0.682304	0.438185	0.476622	F(1,2134)=0.935
			RBBP8_400903_pDONR221	0.0385672	0.680537	0.484901	1.41378	F(1,2134)=4.285
			MMS19	0.250375	0.679711	0.233386	0.601409	F(1,2134)=1.322
			H2AFX	0.150699	0.676133	0.129529	0.82189	F(1,2134)=2.067
			MCM9	0.152033	0.676038	0.201774	0.818062	F(1,2134)=2.053
			POLQ	0.153271	0.675394	0.0711206	0.81454	F(1,2134)=2.041
			BARD1_400778_pDONR221	0.241114	0.674832	0.279153	0.617778	F(1,2134)=1.375
			XPA	0.240097	0.674384	0.376063	0.619613	F(1,2134)=1.381
			DCLRE1C	0.123921	0.668854	0.164723	0.906856	F(1,2134)=2.369
			RPA3_HUM_FL_pDONR221	0.222071	0.66047	0.0422592	0.653507	F(1,2134)=1.492
			PMS1	0.18325	0.656409	0.150682	0.736957	F(1,2134)=1.772
			SLX1B	0.179135	0.654017	0.162257	0.74682	F(1,2134)=1.806
			SMC5_5001102_pDONR221	0.149441	0.652536	0.446483	0.82553	F(1,2134)=2.079
			MMS19_5001031_pDONR221	0.204938	0.646774	0.135627	0.688379	F(1,2134)=1.608
			MLH3_1_500_pDONR221	0.204323	0.646267	0.199578	0.689684	F(1,2134)=1.612
			REC8	0.112047	0.643395	0.249603	0.950601	F(1,2134)=2.527
			HMGN1	0.108197	0.640206	0.131767	0.965787	F(1,2134)=2.583
			EXOSC10_1500_pDONR221	0.127995	0.63203	0.0880143	0.892808	F(1,2134)=2.318
			MTOR_1500_2000_pDONR221	0.126959	0.630975	0.368616	0.896336	F(1,2134)=2.331
			NABP1_HUM_FL_pDONR221	0.126172	0.630168	0.157715	0.899036	F(1,2134)=2.341
			GenEZ ORF Clone: OHu04471C	0.18427	0.629095	0.0908963	0.734546	F(1,2134)=1.764
			PAPD7	0.0321924	0.615083	0.208467	1.49225	F(1,2134)=4.594
			NEIL3_HUM_FL_pDONR221	0.167039	0.613197	0.0445551	0.777183	F(1,2134)=1.911
			MCM8_200600_pDONR221	0.163282	0.60957	0.213346	0.787062	F(1,2134)=1.945
			GEN1_1600_pDONR221	0.106412	0.60849	0.0664982	0.97301	F(1,2134)=2.609
			ERCC3_300783_pDONR221	0.160069	0.606417	0.143913	0.795693	F(1,2134)=1.975
			FANCA_1_500_pDONR221	0.156324	0.602682	0.170621	0.805973	F(1,2134)=2.011
			Cas9WT	0.181071	0.599701	0.681154	0.742152	F(1,2134)=1.790
			INO80_1000_1557_pDONR221	0.141087	0.586741	0.125693	0.850512	F(1,2134)=2.168
			SMG1_1200_1800_pDONR221	0.0790605	0.585826	0.237341	1.10204	F(1,2134)=3.087
			NEIL1_HUM_FL_pDONR221	0.0767159	0.568902	0.0888989	1.11511	F(1,2134)=3.136
			SFR1	0.0443596	0.567343	0.135287	1.35301	F(1,2134)=4.048
			WDR48	0.076718	0.565872	0.133093	1.1151	F(1,2134)=3.136
			CNOT8	0.0852631	0.565612	0.195142	1.06924	F(1,2134)=2.964
			GenEZ ORF Clone: OHu12315C	0.122574	0.565482	0.0202035	0.9116	F(1,2134)=2.386
			PAPD7	0.0447394	0.562656	0.232579	1.34931	F(1,2134)=4.033
			CNOT7	0.0384714	0.557856	0.230564	1.41486	F(1,2134)=4.289
			MTOR_2000_2500_pDONR221	0.0860306	0.557001	0.381097	1.06535	F(1,2134)=2.950
			TONSL_1_500_pDONR221	0.0471756	0.554341	0.208839	1.32628	F(1,2134)=3.944
			C20orf72	0.111103	0.551373	0.422967	0.954274	F(1,2134)=2.541
			PROKR1	0.0668051	0.549513	0.28662	1.17519	F(1,2134)=3.363
			ERCC2_1500_pDONR221	0.108547	0.547636	0.202289	0.96438	F(1,2134)=2.577
			SPIDR_300800_pDONR221	0.075417	0.545394	0.257842	1.12253	F(1,2134)=3.164
			ERCC8	0.0269889	0.544234	0.233603	1.56881	F(1,2134)=4.898
			HUWE1_2500_3000_pDONR221	0.104388	0.541995	0.257715	0.981348	F(1,2134)=2.639
			C16orf73	0.0587454	0.540144	0.261574	1.23103	F(1,2134)=3.576
			ERCC4_500917_pDONR221	0.0592217	0.539261	0.0409024	1.22752	F(1,2134)=3.563
			PRMT6	0.0940502	0.534622	0.431969	1.02664	F(1,2134)=2.806
			ERCC5_multi_domain_pDONR221	0.0985549	0.533776	0.0347966	1.00632	F(1,2134)=2.731
			MSH5	0.0268685	0.531356	0.0405935	1.57076	F(1,2134)=4.906
			LIG3	0.0521475	0.525371	0.53591	1.28277	F(1,2134)=3.775
			AP5Z1_200600_pDONR221	0.0928507	0.525354	0.678907	1.03221	F(1,2134)=2.827
			BRCA1	0.0252988	0.523496	0.0691892	1.5969	F(1,2134)=5.010
			TONSL	0.0438173	0.52225	0.208894	1.35835	F(1,2134)=4.068
			MSH2	0.027993	0.520511	0.127066	1.55295	F(1,2134)=4.835
			INO80_500_1000_pDONR221	0.0887304	0.519009	0.119619	1.05193	F(1,2134)=2.900
			LRIG1	0.0627163	0.516904	0.12294	1.20262	F(1,2134)=3.468
			PAN3	0.0317081	0.516505	0.0664356	1.49883	F(1,2134)=4.620
			DDB1_1500_pDONR221	0.0867045	0.515801	0.436339	1.06196	F(1,2134)=2.937
			CDK7	0.0309395	0.514622	0.202723	1.50949	F(1,2134)=4.662
			HUWE1_1000_1500_pDONR221	0.0806355	0.505817	0.272728	1.09347	F(1,2134)=3.055
			ERCC5	0.0181302	0.485322	0.109147	1.7416	F(1,2134)=5.592
			BRCC3	0.0409677	0.479723	0.105032	1.38756	F(1,2134)=4.182
			MSH6_360_900_pDONR221	0.0138391	0.475262	0.209647	1.85889	F(1,2134)=6.069
			FANCB_200600_pDONR221	0.0630369	0.47292	0.116279	1.2004	F(1,2134)=3.459
			TREX2	0.00994778	0.472284	0.0938489	2.00227	F(1,2134)=6.656
			EXO1_300847_pDONR221	0.0614701	0.469638	0.356362	1.21134	F(1,2134)=3.501
			M_avi_1790_pDONR221	0.0305564	0.468978	0.111403	1.5149	F(1,2134)=4.684
			REC8	0.0184204	0.450168	0.260829	1.7347	F(1,2134)=5.564
			MLH3	0.0211646	0.442037	0.136685	1.67439	F(1,2134)=5.321
			XAB2_1500_pDONR221	0.0493119	0.441488	0.175138	1.30705	F(1,2134)=3.869
			MCM9_300900_pDONR221	0.0487673	0.440097	0.116912	1.31187	F(1,2134)=3.888
			SMG1_1_500_pDONR221	0.00788883	0.426986	0.174585	2.10299	F(1,2134)=7.072
			TONSL_900_1379_pDONR221	0.00992004	0.401186	0.251938	2.00349	F(1,2134)=6.661
			GenEZ ORF Clone: OHu25748C	0.0354484	0.40114	0.041809	1.4504	F(1,2134)=4.429
			PRKDC_1500_2000_pDONR221	0.0036916	0.400602	0.128955	2.43279	F(1,2134)=8.448
			XPC	0.0137559	0.397237	0.281193	1.86151	F(1,2134)=6.079
			USP7	0.0326286	0.39132	0.0446452	1.4864	F(1,2134)=4.571
			LIG3_300900_pDONR221	0.0318851	0.38861	0.218572	1.49641	F(1,2134)=4.611
			SMC5_1500_pDONR221	0.00527899	0.386754	0.0872309	2.27745	F(1,2134)=7.797
			ERCC3	0.00537077	0.376723	0.0867352	2.26996	F(1,2134)=7.766
			RAD54L_150700_pDONR221	0.00669027	0.368393	0.228995	2.17456	F(1,2134)=7.369
			GenEZ ORF Clone: OHu27000C	0.0248966	0.360069	0.0990033	1.60386	F(1,2134)=5.038
			GenEZ ORF Clone: OHu31586C	0.0664076	0.358252	0.0211416	1.17778	F(1,2134)=3.373
			LIG4_500920_pDONR221	0.0233997	0.353066	0.122894	1.63079	F(1,2134)=5.146
			PARP2	0.0142692	0.346795	0.321545	1.8456	F(1,2134)=6.014
			phage_T5_D13_pDONR221	0.0214642	0.34341	0.0195256	1.66829	F(1,2134)=5.297
			BRCA2_1000_1500_pDONR221	0.0073655	0.337516	0.0159452	2.1328	F(1,2134)=7.195
			USP47_600_1000_pDONR221	0.0187891	0.328734	0.0997656	1.72609	F(1,2134)=5.529
			RDH14	0.00225363	0.322503	0.0513775	2.64712	F(1,2134)=9.353
			MNAT1	0.00435867	0.313013	0.342009	2.36065	F(1,2134)=8.145
			HUWE1_3600_4375_pDONR221	0.00502375	0.305586	0.0391243	2.29897	F(1,2134)=7.887
			HUS1	0.00207105	0.289568	0.187544	2.68381	F(1,2134)=9.509
			ABL1_6001150_pDONR221	0.0113039	0.274858	0.0282283	1.94677	F(1,2134)=6.428
			PARP1_4001015_pDONR221	0.00100922	0.25937	0.0794598	2.99601	F(1,2134)=10.841
			GenEZ ORF Clone: OHu19811C	0.0086758	0.248022	0.0303122	2.06169	F(1,2134)=6.901
			FAN1_multi_domain_pDONR221	0.00253614	0.132282	0.04032	2.59583	F(1,2134)=9.136
			EXO1_1500_pDONR221	0.00087004	0.0412371	0.0583181	3.06046	F(1,2134)=11.117
			LIG4_1600_pDONR221	0.00067815	0.0210814	0.00728516	3.16867	F(1,2134)=11.582
			AP5Z1_200600_pDONR221	0.048878	0.0158081	0	1.31089	F(1,2134)=3.884
			MLH1_1400_pDONR221	0.00531006	0.0157498	5.82395e-05	2.2749	F(1,2134)=7.787
Figure	Cell line	Comparison	Fusion	p value	% GFP, normalized to full experiment mean	SD	-LOG10(p)	dfs and F
Fig. 1c	HEK293T	Validation in HEK293T cells	HMGB1	0.0972951	1.25331	0.023333	1.01191	F(1,246)=2.770
	GFP-RFP-sgRNA	(experiment average-normalized	POLD3	0.38083	1.13416	0.0687958	0.419269	F(1,246)=0.771
		data points):	XRCC1	0.0308465	1.20539	0.0217463	1.51079	F(1,246)=4.716
		one-way Anova	RFC4	0.0387218	1.31531	0.0418439	1.41204	F(1,246)=4.319
		(mean of each replicate group to the	SIRT6	0.0140558	1.37394	0.106821	1.85215	F(1,246)=6.118
		mean of all other replicate groups)	XRCC1	0.0308465	1.25634	0.0225881	1.51079	F(1,246)=4.716
		n=4	EDHFR	0.754921	0.952182	0.0791638	0.122099	F(1,246)=0.098
			MORF4L1	0.0554374	1.29235	0.155055	1.2562	F(1,246)=3.704
			SPIDR_400916_pDONR221	0.0102375	1.39075	0.0767437	1.98981	F(1,246)=6.696
			MSH4_300937_pDONR221	0.0476084	1.30226	0.0552278	1.32232	F(1,246)=3.963
			SPIDR	0.0272944	1.33649	0.044424	1.56393	F(1,246)=4.931
			PSMD14	0.0253113	1.34091	0.0360847	1.59669	F(1,246)=5.064
			HMGB2	0.523119	1.09779	0.0171798	0.2814	F(1,246)=0.409
			XPC_400940_pDONR221	0.0529274	1.29539	0.0705682	1.27632	F(1,246)=3.783
			RAD51AP1	0.0265857	1.33804	0.0648405	1.57535	F(1,246)=4.977
			CCDC155	0.941096	1.01132	0.0303383	0.0263662	F(1,246)=0.005
			E coli recD	0.093711	1.25605	0.0542893	1.02821	F(1,246)=2.831
			GW_eDHFR	0.0219655	1.34911	0.0323682	1.65826	F(1,246)=5.316
			GTF2H1	0.723306	0.945767	0.0411094	0.140678	F(1,246)=0.126
			SMC5	0.0148428	1.37098	0.0905268	1.82848	F(1,246)=6.020
			TP53BP1_1400_1978_pDONR221	0.0982852	1.25257	0.042049	1.00751	F(1,246)=2.754
			Phage T7 gene 6	0.0737246	1.27308	0.0949656	1.13239	F(1,246)=3.226
			POLR2I	0.290664	1.1617	0.0311198	0.536609	F(1,246)=1.121
			SNAP	0.0874434	1.26105	0.046906	1.05827	F(1,246)=2.944
			RPA4	0.0592059	1.28799	0.114766	1.22763	F(1,246)=3.593
			STREP	0.141948	0.775507	0.0281706	0.84787	F(1,246)=2.171
			RAD50_900_1300_pDONR221	0.247015	1.17711	0.0370441	0.607276	F(1,246)=1.347
			SETD2_1000_1500_pDONR221	0.00017327	0.432879	0.014511	3.76128	F(1,246)=14.543
			SMC6	0.43512	1.11949	0.0248895	0.361391	F(1,246)=0.611
			POLR2H	0.783607	0.957931	0.0330858	0.105902	F(1,246)=0.076
			POLE2	0.953468	1.00894	0.0521834	0.0206939	F(1,246)=0.003
			GW_Streptavidin	0.924339	1.01455	0.0504893	0.0341688	F(1,246)=0.009
			RPA2	0.875904	1.02392	0.0819381	0.0575437	F(1,246)=0.024
			GTF2H2D	0.214876	1.18971	0.0226882	0.667812	F(1,246)=1.546
			PALB2_5001100_pDONR221	0.193374	1.19892	0.0327882	0.713601	F(1,246)=1.701
			RFC5	0.982042	1.00345	0.0328234	0.00786996	F(1,246)=0.001
			DCLRE1C	0.493735	1.1048	0.061059	0.306506	F(1,246)=0.470
			CCNH	0.0391259	0.685333	0.282497	1.40754	F(1,246)=4.301
			HALO	0.977817	0.99574	0.0438328	0.00974251	F(1,246)=0.001
			RAD51D	0.757101	1.04738	0.0293957	0.120846	F(1,246)=0.096
			POLD2	0.226062	0.814817	0.0485378	0.645772	F(1,246)=1.473
			ZRANB3	0.832435	0.967587	0.0353714	0.0796498	F(1,246)=0.045
			MDC1_1100_1700_pDONR221	0.780039	1.04278	0.0204015	0.107883	F(1,246)=0.078
			MMS19_1500_pDONR221	0.278587	0.834205	0.0590688	0.55504	F(1,246)=1.179
			NBN_200754_pDONR221	0.169762	0.790063	0.278312	0.770159	F(1,246)=1.896
			PMS1_1500_pDONR221	0.28464	0.836273	0.0519677	0.545704	F(1,246)=1.150
			XRN2	0.904668	0.981652	0.0692691	0.0435106	F(1,246)=0.014
			XRCC2	0.285948	0.836716	0.0170133	0.543713	F(1,246)=1.144
			TREX1	0.489133	0.894084	0.0740361	0.310573	F(1,246)=0.480
			ZFYVE26_1500_2000_pDONR221	0.538064	0.905704	0.00971584	0.269166	F(1,246)=0.380
			HUWE1_3000_3500_pDONR221	0.208822	0.807765	0.0543966	0.680224	F(1,246)=1.588
			RAD50_1_500_pDONR221	0.376169	0.864529	0.0604555	0.424616	F(1,246)=0.786
			POLD1_5801134_pDONR221	0.35322	0.857899	0.0425495	0.451955	F(1,246)=0.865
			CNOT1_1800_2350_pDONR221	0.00055368	0.527867	0.0568499	3.25674	F(1,246)=12.245
			CNOT1_1800_2350_pDONR221	0.00055368	0.739017	0.0283123	3.25674	F(1,246)=12.245
			ERCC2_300761_pDONR221	0.00127452	0.511612	0.0623776	2.89465	F(1,246)=10.623
			SIRT1_1500_pDONR221	0.0192523	0.643408	0.0277843	1.71552	F(1,246)=5.551
			SMC6_5001092_pDONR221	0.0971331	0.746564	0.0642418	1.01263	F(1,246)=2.773
			GW_Halo	0.0778398	0.730705	0.0663191	1.1088	F(1,246)=3.136
			GW_SNAP	9.334e-12	0.00325062	0.00153429	11.0299	F(1,246)=51.254
			SPIDR_1500_pDONR221	9.452e-12	0.00349005	0.00192902	11.0245	F(1,246)=51.224
	Cell line	Comparison	Fusion	p value	% GFP, normalized to full experiment mean	SD	-LOG10(p)	dfs and F
	RPE	Validation in RPE cells	HMGB1	0.3746	1.22199	0.379541	0.426432	F(1,116)=0.794
	GFP-RFP-sgRNA	(experiment average-normalized	POLD3	0.00060459	1.83748	0.0712312	3.21854	F(1,116)=12.435
		data points):	XRCC1	0.00414232	1.58278	0.222829	2.38276	F(1,116)=8.557
		one-way Anova	RFC4	0.122232	1.38506	0.0400132	0.912814	F(1,116)=2.424
		(mean of each replicate group to the	SIRT6	0.149221	1.35959	0.0234912	0.826169	F(1,116)=2.108
		mean of all other replicate groups)	XRCC1	0.00414232	1.40623	0.0730176	2.38276	F(1,116)=8.557
		n=2	EDHFR	0.697524	0.902694	0.00798628	0.156441	F(1,116)=0.152
			MORF4L1	0.081797	1.43301	0.0551834	1.08726	F(1,116)=3.082
			SPIDR_400916_pDONR221	0.579565	1.13866	0.167615	0.236898	F(1,116)=0.309
			MSH4_300937_pDONR221	0.176428	1.33722	0.0458589	0.753431	F(1,116)=1.850
			SPIDR					F(0,117)=
			PSMD14	0.0379228	1.51503	0.25647	1.4211	F(1,116)=4.409
			HMGB2	0.0650127	1.45872	0.0205288	1.187	F(1,116)=3.470
			XPC_400940_pDONR221	0.62594	1.12201	0.0274892	0.203467	F(1,116)=0.239
			RAD51AP1	0.759047	1.0768	0.0296521	0.119731	F(1,116)=0.095
			CCDC155	0.0637485	1.46087	0.0770533	1.19553	F(1,116)=3.504
			E coli recD	0.0326202	1.52988	0.286234	1.48651	F(1,116)=4.677
			GW_eDHFR	0.392372	1.21387	0.184956	0.406302	F(1,116)=0.737
			GTF2H1	0.702779	1.09553	0.0487236	0.153181	F(1,116)=0.146
			SMC5	0.942728	1.01799	0.136181	0.0256138	F(1,116)=0.005
			TP53BP1_1400_1978_pDONR221	0.552118	1.1488	0.0453234	0.257968	F(1,116)=0.356
			Phage T7 gene 6	0.371267	1.22353	0.0335725	0.430313	F(1,116)=0.806
			POLR2I	0.572402	1.14128	0.0337681	0.242299	F(1,116)=0.320
			SNAP	0.922517	0.975642	0.0242693	0.0350255	F(1,116)=0.010
			RPA4	0.76395	1.07519	0.00442147	0.116935	F(1,116)=0.091
			STREP	0.336587	1.24018	0.227144	0.472903	F(1,116)=0.931
			RAD50_900_1300_pDONR221	0.753253	1.07871	0.18102	0.123059	F(1,116)=0.099
			SETD2_1000_1500_pDONR221	0.0237527	1.56006	0.208476	1.62429	F(1,116)=5.250
			SMC6	0.971384	1.00898	0.0486646	0.0126092	F(1,116)=0.001
			POLR2H	0.642418	1.11623	0.231795	0.192182	F(1,116)=0.217
			POLE2	0.960042	0.987453	0.0951436	0.0177099	F(1,116)=0.003
			GW_Streptavidin
			RPA2	0.954724	0.985781	0.105985	0.0201222	F(1,116)=0.003
			GTF2H2D	0.624799	0.877582	0.0514689	0.20426	F(1,116)=0.240
			PALB2_5001100_pDONR221	0.550403	0.850563	0.0155021	0.259319	F(1,116)=0.359
			RFC5	0.598035	0.868039	0.0177212	0.223274	F(1,116)=0.280
			DCLRE1C	0.911366	0.972122	0.0356619	0.0403074	F(1,116)=0.012
			CCNH	0.817716	1.05772	0.0368095	0.0873974	F(1,116)=0.053
			HALO	0.484023	0.824915	0.0638279	0.315134	F(1,116)=0.493
			RAD51D	0.301034	0.741587	0.0824862	0.521384	F(1,116)=1.079
			POLD2	0.670165	1.10663	0.0594756	0.173818	F(1,116)=0.182
			ZRANB3	0.450216	0.811136	0.020811	0.346579	F(1,116)=0.574
			MDC1_1100_1700_pDONR221	0.207575	0.68546	0.000482025	0.682825	F(1,116)=1.606
			MMS19_1500_pDONR221	0.556476	0.85283	0.0418781	0.254553	F(1,116)=0.348
			NBN_200754_pDONR221	0.943158	0.982143	0.00989441	0.0254156	F(1,116)=0.005
			PMS1_1500_pDONR221	0.480744	0.823602	0.0660828	0.318086	F(1,116)=0.500
			XRN2	0.289855	0.735564	0.0637079	0.537819	F(1,116)=1.131
			XRCC2	0.273134	0.72626	0.114765	0.563624	F(1,116)=1.212
			TREX1	0.120676	0.613348	0.0517181	0.918378	F(1,116)=2.444
			ZFYVE26_1500_2000_pDONR221	0.0956121	0.585134	0.0184864	1.01949	F(1,116)=2.823
			HUWE1_3000_3500_pDONR221	0.0793235	0.563483	0.0296404	1.1006	F(1,116)=3.134
			RAD50_1_500_pDONR221	0.0393556	0.488686	0.045156	1.40499	F(1,116)=4.343
			POLD1_5801134_pDONR221	0.0534947	0.520299	0.103014	1.27169	F(1,116)=3.806
			CNOT1_1800_2350_pDONR221	0.106329	0.993952	0.152927	0.973347	F(1,116)=2.649
			CNOT1_1800_2350_pDONR221	0.106329	0.44222	0.114161	0.973347	F(1,116)=2.649
			ERCC2_300761_pDONR221	0.26636	0.722381	0.0990681	0.574531	F(1,116)=1.247
			SIRT1_1500_pDONR221	0.155109	0.645497	0.0788484	0.809362	F(1,116)=2.048
			SMC6_5001092_pDONR221	0.00670112	0.331636	0.0560703	2.17385	F(1,116)=7.623
			GW_Halo	0.017965	0.414486	0.0418153	1.74557	F(1,116)=5.762
			GW_SNAP	0.0570908	0.527217	0.0291635	1.24343	F(1,116)=3.693
	Cell line	Comparison	Fusion	p value	% GFP, normalized to full experiment mean	SD	-LOG10(p)	dfs and F
	RPE	Validation in RPE cells	HMGB1	5.639e-06	3.31732	0.633063	5.2488	F(1,116)=22.656
	GFP-BFP-sgRNA	(experiment average-normalized	POLD3	0.00791451	2.39525	0.235325	2.10158	F(1,116)=7.304
		data points):	XRCC1	0.00952444	2.12365	0.405729	2.02116	F(1,116)=6.951
		one-way Anova	RFC4	0.0599637	1.99576	0.277839	1.22211	F(1,116)=3.609
		(mean of each replicate group to the	SIRT6	0.212631	1.66261	0.213111	0.672373	F(1,116)=1.571
		mean of all other replicate groups)	XRCC1	0.00952444	1.78735	0.230476	2.02116	F(1,116)=6.951
		n=2	EDHFR	0.00045449	2.8216	1.74164	3.34248	F(1,116)=13.027
			MORF4L1	0.268729	1.58841	0.0315362	0.570686	F(1,116)=1.235
			SPIDR_400916_pDONR221	0.25478	1.60577	0.156271	0.593835	F(1,116)=1.310
			MSH4_300937_pDONR221	0.424121	1.42577	0.137329	0.37251	F(1,116)=0.643
			SPIDR
			PSMD14	0.829687	1.11473	0.120029	0.0810858	F(1,116)=0.046
			HMGB2	0.302323	1.54894	0.383722	0.519529	F(1,116)=1.073
			XPC_400940_pDONR221	0.363178	1.48419	0.249432	0.439881	F(1,116)=0.833
			RAD51AP1	0.439792	1.41156	0.123119	0.356753	F(1,116)=0.601
			CCDC155	0.236566	1.62946	0.0189036	0.626048	F(1,116)=1.416
			E coli recD	0.968507	0.97894	0.0410785	0.0138974	F(1,116)=0.002
			GW_eDHFR	0.977939	0.98525	0.179972	0.00968804	F(1,116)=0.001
			GTF2H1	0.0986261	1.8758	1.0232	1.00601	F(1,116)=2.772
			SMC5	0.9042	1.0642	0.0441817	0.0437356	F(1,116)=0.015
			TP53BP1_1400_1978_pDONR221	0.770213	1.15578	0.132661	0.113389	F(1,116)=0.086
			Phage T7 gene 6	0.888558	0.925255	0.0126067	0.0513144	F(1,116)=0.020
			POLR2I	0.838942	1.10841	0.142074	0.076268	F(1,116)=0.041
			SNAP	0.970103	1.01999	0.053711	0.0131822	F(1,116)=0.001
			RPA4	0.673399	0.775254	0.077347	0.171728	F(1,116)=0.179
			STREP	0.288577	1.56472	0.168904	0.539738	F(1,116)=1.137
			RAD50_900_1300_pDONR221	0.651902	0.759467	0.00787434	0.185817	F(1,116)=0.205
			SETD2_1000_1500_pDONR221	0.153856	1.75735	0.146794	0.812885	F(1,116)=2.060
			SMC6	0.876867	0.917354	0.219447	0.0570662	F(1,116)=0.024
			POLR2H	0.815876	1.12419	0.211547	0.0883758	F(1,116)=0.054
			POLE2	0.866797	1.08946	0.0379236	0.0620825	F(1,116)=0.028
			GW_Streptavidin
			RPA2	0.911989	0.941042	0.0820793	0.0400104	F(1,116)=0.012
			GTF2H2D	0.568859	0.696304	0.213137	0.244995	F(1,116)=0.326
			PALB2_5001100_pDONR221	0.55487	0.685262	0.173701	0.255809	F(1,116)=0.351
			RFC5	0.909644	0.939465	0.0268167	0.0411285	F(1,116)=0.013
			DCLRE1C	0.386091	0.538416	0.00156452	0.413311	F(1,116)=0.757
			CCNH	0.657625	1.23631	0.213189	0.182021	F(1,116)=0.197
			HALO	0.634904	0.746834	0.0489269	0.197292	F(1,116)=0.227
			RAD51D	0.35898	0.511574	0.0284071	0.44493	F(1,116)=0.848
			POLD2	0.4144	0.565259	0.0252781	0.38258	F(1,116)=0.671
			ZRANB3	0.376381	0.528939	0.153142	0.424373	F(1,116)=0.789
			MDC1_1100_1700_pDONR221	0.298602	0.446833	0.178408	0.524907	F(1,116)=1.090
			MMS19_1500_pDONR221	0.511969	0.650519	0.0599821	0.290756	F(1,116)=0.433
			NBN_200754_pDONR221	0.45816	0.604734	0.0931732	0.338982	F(1,116)=0.554
			PMS1_1500_pDONR221	0.319868	0.470521	0.0410397	0.49503	F(1,116)=0.998
			XRN2	0.155004	0.244738	0.131058	0.809658	F(1,116)=2.049
			XRCC2	0.31698	0.467366	0.0694856	0.498968	F(1,116)=1.010
			TREX1	0.269146	0.412103	0.071063	0.570012	F(1,116)=1.233
			ZFYVE26_1500_2000_pDONR221	0.128977	0.194208	0.0331524	0.889486	F(1,116)=2.338
			HUWE1_3000_3500_pDONR221	0.228757	0.359996	0.0378848	0.640626	F(1,116)=1.464
			RAD50_1_500_pDONR221	0.171274	0.273158	0.102638	0.766308	F(1,116)=1.895
			POLD1_5801134_pDONR221	0.128223	0.19263	0.0221102	0.892035	F(1,116)=2.347
			CNOT1_1800_2350_pDONR221	0.0555437	0.358418	0.0173779	1.25536	F(1,116)=3.741
			CNOT1_1800_2350_pDONR221	0.0555437	0.22105	0.00630982	1.25536	F(1,116)=3.741
			ERCC2_300761_pDONR221	0.221895	0.350518	0.189463	0.653853	F(1,116)=1.508
			SIRT1_1500_pDONR221	0.10908	0.15	0.0647403	0.962256	F(1,116)=2.607
			SMC6_5001092_pDONR221	0.149844	0.235261	0.0205198	0.824361	F(1,116)=2.102
			GW_Halo	0.0785572	0.0678952	0.0394751	1.10481	F(1,116)=3.150
			GW_SNAP	0.0882332	0.0963152	0.0110551	1.05437	F(1,116)=2.956
Figure	Cell line	Comparison	Fusion	p value	% HDR, normalized to full experiment mean	SD	-LOG10(p)	dfs and F
Fig. 1f	HEK293T	Validation for endogenous genes:	RFC4	1.993e-11	3.45229	0.881121	10.7005	F(1,98)=57.428
	Enh 4-1 sgRNA	(experiment average-normalized	POLR2H	0.28748	1.44801	0.333824	0.541392	F(1,98)=1.144
		data points):	STREP	0.19543	1.54071	0.283517	0.709009	F(1,98)=1.699
		one-way Anova	POLD3	0.808637	0.89692	0.406856	0.0922466	F(1,98)=0.059
		(mean of each replicate group to the	RFC5	0.0104464	2.03922	0.450298	1.98103	F(1,98)=6.817
		mean of all other replicate groups)	HMGB2	0.40687	1.35365	0.402618	0.390545	F(1,98)=0.694
		n=3	SNAP	0.418749	1.34525	0.271279	0.378046	F(1,98)=0.659
			POLE2	0.207998	1.52645	0.207066	0.681942	F(1,98)=1.606
			XRCC1	0.208108	1.52633	0.500658	0.681711	F(1,98)=1.606
			POLD2	0.343833	1.4009	0.305096	0.463652	F(1,98)=0.905
			SIRT6	0.151755	1.72977	0.104462	0.818857	F(1,98)=2.087
			RAD51AP1	0.752174	0.889782	0.322592	0.123682	F(1,98)=0.100
			CCDC155	0.87926	1.07944	0.161871	0.0558826	F(1,98)=0.023
			SMC5	0.600188	1.23027	0.301579	0.221713	F(1,98)=0.277
			SMC6	0.326062	1.41518	0.365996	0.486699	F(1,98)=0.974
			RPA4	0.690867	0.856594	0.0953117	0.160606	F(1,98)=0.159
			GTF2H1	0.917594	0.966168	0.0385736	0.0373496	F(1,98)=0.011
			MORF4L1	0.934215	0.984349	0.14273	0.0295531	F(1,98)=0.007
			SPIDR	0.615667	0.814347	0.225354	0.210654	F(1,98)=0.254
			ZRANB3	0.77123	1.13574	0.13351	0.112816	F(1,98)=0.085
			POLR2I	0.713414	0.868912	0.0563851	0.146659	F(1,98)=0.136
			HMGB1	0.68939	1.30138	0	0.161535	F(1,98)=0.161
			RPA2	0.78932	1.12618	0.134978	0.102747	F(1,98)=0.072
			HALO	0.216463	0.518466	0.306483	0.664617	F(1,98)=1.548
			CCNH	0.278712	0.579791	0.166901	0.554845	F(1,98)=1.186
			DCLRE1C	0.546977	0.773762	0.224441	0.262031	F(1,98)=0.365
			TREX1	0.446676	0.709635	0.0155439	0.350007	F(1,98)=0.584
			EDHFR	0.236698	0.539605	0.12576	0.625805	F(1,98)=1.417
			GTF2H2D	0.14659	0.432191	0.190737	0.833896	F(1,98)=2.141
			XRN2	0.154534	0.443362	0.350256	0.810976	F(1,98)=2.059
			XRCC2	0.0578326	0.255464	0.0235635	1.23783	F(1,98)=3.684
			RAD51D	0.0724637	0.295276	0.0871625	1.13988	F(1,98)=3.297
			CNOT1_1800_2350_pDONR221	0.0286322	0.140959	0.0248677	1.54315	F(1,98)=4.934
			SPIDR_1500_pDONR221	0.262499	0.225127	0	0.580872	F(1,98)=1.270
			SIRT1_1500_pDONR221	0.057374	0.0776325	0.0211826	1.24128	F(1,98)=3.698
	Cell line	Comparison	Fusion	p value	% HDR, normalized to full experiment mean	SD	-LOG10(p)	dfs and F
	HEK293T	Validation for endogenous genes:	RFC4	0.00099707	2.36287	0.114406	3.00127	F(1,100)=11.502
	CTCF1 sgRNA	(experiment average-normalized	POLR2H	0.00726681	2.12677	0.188555	2.13866	F(1,100)=7.510
		data points):	STREP	0.494334	1.37915	0.408949	0.305979	F(1,100)=0.471
		one-way Anova	POLD3	0.0338272	1.90278	1.01243	1.47073	F(1,100)=4.630
		(mean of each replicate group to the	RFC5	0.745491	1.16448	0.113783	0.127558	F(1,100)=0.106
		mean of all other replicate groups)	HMGB2	0.190041	1.57251	0.979832	0.721152	F(1,100)=1.741
		n=3	SNAP	0.0634911	1.79517	0.586873	1.19729	F(1,100)=3.522
			POLE2	0.438762	1.3512	0.226518	0.35777	F(1,100)=0.604
			XRCC1	0.379283	1.39465	0.382951	0.421037	F(1,100)=0.780
			POLD2	0.302638	1.45731	0.283522	0.519077	F(1,100)=1.074
			SIRT6	0.623617	0.825281	0.511387	0.205082	F(1,100)=0.242
			RAD51AP1	0.192141	1.56997	0.252186	0.71638	F(1,100)=1.724
			CCDC155	0.863195	1.10113	0.770217	0.0638909	F(1,100)=0.030
			SMC5	0.829169	0.939615	0.167742	0.0813569	F(1,100)=0.047
			SMC6	0.945573	1.05783	0.220119	0.0243051	F(1,100)=0.005
			RPA4	0.94573	1.05774	0.388753	0.0242327	F(1,100)=0.005
			GTF2H1	0.815375	0.932238	0.146332	0.0886425	F(1,100)=0.055
			MORF4L1	0.568072	1.26684	0.742385	0.245597	F(1,100)=0.328
			SPIDR	0.421427	1.36349	1.26694	0.375278	F(1,100)=0.652
			ZRANB3	0.778926	0.912593	0.503972	0.108504	F(1,100)=0.079
			POLR2I	0.962109	1.00507	0.0495946	0.0167757	F(1,100)=0.002
			HMGB1	0.215622	0.516001	0.225307	0.666308	F(1,100)=1.553
			RPA2	0.041636	0.190276	0.121017	1.38053	F(1,100)=4.259
			HALO	0.679083	0.817542	0.469244	0.168077	F(1,100)=0.172
			CCNH	0.559615	0.786789	0.297049	0.25211	F(1,100)=0.343
			DCLRE1C	0.37784	0.663068	0.224401	0.422692	F(1,100)=0.785
			TREX1	0.34592	0.637982	0.147848	0.461024	F(1,100)=0.897
			EDHFR	0.194195	0.491323	0.311363	0.711762	F(1,100)=1.708
			GTF2H2D	0.658244	0.802897	0.10487	0.181613	F(1,100)=0.197
			XRN2	0.102149	0.353629	0.177936	0.990765	F(1,100)=2.721
			XRCC2	0.551773	0.781935	0.684476	0.258239	F(1,100)=0.357
			RAD51D	0.0657832	0.270074	0.0242447	1.18189	F(1,100)=3.461
			CNOT1_1800_2350_pDONR221	0.183006	0.477647	0.600043	0.737536	F(1,100)=1.798
			SPIDR_1500_pDONR221	0.813645	1.20104	0	0.0895649	F(1,100)=0.056
			SIRT1_1500_pDONR221	0.0233662	0.0977375	0.090006	1.63141	F(1,100)=5.303
	Cell line	Comparison	Fusion	p value	% HDR, normalized to full experiment mean	SD	-LOG10(p)	dfs and F
	HEK293T	Validation for endogenous genes:	RFC4	0.0640354	1.57303	0.259564	1.19358	F(1,98)=3.508
	RNF2 sgRNA	(experiment average-normalized	POLR2H	0.0170537	1.72829	0.157347	1.76818	F(1,98)=5.890
		data points):	STREP	0.0231302	1.85129	0.0793708	1.63582	F(1,98)=5.325
		one-way Anova	POLD3	0.00042534	2.28628	0.04607	3.37126	F(1,98)=13.310
		(mean of each replicate group to the	RFC5	0.449595	1.24744	0.134956	0.347179	F(1,98)=0.576
		mean of all other replicate groups)	HMGB2	0.148931	1.45249	0.036767	0.827015	F(1,98)=2.116
		n=3	SNAP	0.273458	1.3489	0.319767	0.563109	F(1,98)=1.213
			POLE2	0.10811	1.50085	0.108046	0.966132	F(1,98)=2.629
			XRCC1	0.407648	1.26901	0.529785	0.389714	F(1,98)=0.692
			POLD2	0.486084	1.278	0.0410043	0.313289	F(1,98)=0.489
			SIRT6	0.107709	1.61261	0.0292394	0.967749	F(1,98)=2.636
			RAD51AP1	0.396673	1.27487	0.129857	0.401568	F(1,98)=0.725
			CCDC155	0.0922882	1.52348	0.245741	1.03485	F(1,98)=2.890
			SMC5	0.80061	0.943928	0.138153	0.096579	F(1,98)=0.064
			SMC6	0.401611	0.767779	0.138702	0.396194	F(1,98)=0.710
			RPA4	0.26491	1.43214	0.159592	0.576901	F(1,98)=1.257
			GTF2H1	0.19097	1.50286	0.0813038	0.719036	F(1,98)=1.734
			MORF4L1	0.588816	0.857278	0.0463121	0.230021	F(1,98)=0.294
			SPIDR	0.768322	1.10872	0.0825723	0.114457	F(1,98)=0.087
			ZRANB3	0.458585	0.797031	0.128727	0.33858	F(1,98)=0.554
			POLR2I	0.315537	0.718419	0.126696	0.50095	F(1,98)=1.018
			HMGB1	0.872633	0.971708	0.689034	0.0591683	F(1,98)=0.026
			RPA2	0.828557	1.08523	0.217457	0.0816778	F(1,98)=0.047
			HALO	0.654154	0.885108	0.190087	0.18432	F(1,98)=0.202
			CCNH	0.59916	0.86177	0.072039	0.222457	F(1,98)=0.278
			DCLRE1C	0.63901	0.878766	0.0877419	0.194492	F(1,98)=0.221
			TREX1	0.364137	0.747185	0.0955408	0.438735	F(1,98)=0.831
			EDHFR	0.856166	1.0746	0.0712367	0.0674418	F(1,98)=0.033
			GTF2H2D	0.370115	0.6883	0.123484	0.431664	F(1,98)=0.811
			XRN2	0.490155	0.812369	0.0297666	0.309667	F(1,98)=0.480
			XRCC2	0.0390957	0.405186	0.0704583	1.40787	F(1,98)=4.373
			RAD51D	0.10059	0.528743	0.140008	0.997444	F(1,98)=2.748
			CNOT1_1800_2350_pDONR221	0.00481704	0.187785	0.0291339	2.31722	F(1,98)=8.322
			SPIDR_1500_pDONR221	0.00092331	0.0494313	0.0394896	3.03465	F(1,98)=11.676
			SIRT1_1500_pDONR221	0.00712325	0.0402757	0.0286755	2.14732	F(1,98)=7.556
	Cell line	Comparison	Fusion	p value	% HDR, normalized to full experiment mean	SD	-LOG10(p)	dfs and F
	HEK293T	Validation for endogenous genes:	RFC4	0.00957184	1.7049	0.280137	2.019	F(1,105)=6.966
	ELANE sgRNA	(experiment average-normalized	POLR2H	0.0186365	1.64438	0.3574	1.72963	F(1,105)=5.712
		data points):	STREP	0.00110339	1.87257	0.269296	2.95727	F(1,105)=11.260
		one-way Anova	POLD3	0.372579	1.2642	0.198696	0.428782	F(1,105)=0.802
		(mean of each replicate group to the	RFC5	0.229197	1.34606	0.0649276	0.639791	F(1,105)=1.463
		mean of all other replicate groups)	HMGB2	0.217688	1.35401	0.15784	0.662166	F(1,105)=1.538
		n=3	SNAP	0.542271	1.18956	0.0995464	0.265784	F(1,105)=0.374
			POLE2	0.370766	1.26509	0.143873	0.430901	F(1,105)=0.808
			XRCC1	0.182161	1.38062	0.172507	0.739543	F(1,105)=1.804
			POLD2	0.333897	1.28389	0.342725	0.476388	F(1,105)=0.942
			SIRT6	0.262916	1.32426	0.25935	0.580183	F(1,105)=1.267
			RAD51AP1	0.218149	1.35368	0.21764	0.661247	F(1,105)=1.535
			CCDC155	0.988796	1.02418	0.0787996	0.00489334	F(1,105)=0.000
			SMC5	0.0516641	1.53991	0.13131	1.28681	F(1,105)=3.874
			SMC6	0.380711	1.26022	0.100031	0.419405	F(1,105)=0.775
			RPA4	0.632962	1.15463	0.128756	0.198623	F(1,105)=0.229
			GTF2H1	0.974914	1.03625	0.208435	0.0110338	F(1,105)=0.001
			MORF4L1	0.607669	1.16413	0.112061	0.216333	F(1,105)=0.265
			SPIDR	0.511134	0.853629	0.147998	0.291465	F(1,105)=0.435
			ZRANB3	0.699558	1.13033	0.0754517	0.155176	F(1,105)=0.150
			POLR2I	0.703237	1.12902	0.104013	0.152898	F(1,105)=0.146
			HMGB1	0.973354	1.01904	0.185901	0.0117292	F(1,105)=0.001
			RPA2	0.741157	0.940226	0.222195	0.13009	F(1,105)=0.110
			HALO	0.827632	1.08571	0.109327	0.0821629	F(1,105)=0.048
			CCNH	0.602338	0.889656	0.0369683	0.22016	F(1,105)=0.273
			DCLRE1C	0.343574	0.776976	0.0376459	0.46398	F(1,105)=0.905
			TREX1	0.903092	0.99558	0.282072	0.0442681	F(1,105)=0.015
			EDHFR	0.0614269	0.53543	0.107959	1.21164	F(1,105)=3.575
			GTF2H2D	0.224459	0.706516	0.0448193	0.648863	F(1,105)=1.493
			XRN2	0.54001	0.86535	0.15517	0.267598	F(1,105)=0.378
			XRCC2	0.0272769	0.448564	0.147335	1.56421	F(1,105)=5.012
			RAD51D	0.0754981	0.559535	0.0573288	1.12206	F(1,105)=3.223
			CNOT1_1800_2350_pDONR221	0.00250191	0.242497	0.0540363	2.60173	F(1,105)=9.596
			SPIDR_1500_pDONR221	0.00144918	0.0121166	0.00264625	2.83888	F(1,105)=10.701
			SIRT1_1500_pDONR221	0.00013667	0.0495017	0.00420649	3.86433	F(1,105)=15.682
Figure	Cell line	Comparison	Fusion/Time point	p value	dfs and F
Fig. 3b	RPE-1	P-values denote significance of the total	RAD51AP1	0.885424	F(1,6)=.0226019
		editing (HDR+NHEJ) increment	SMC5	0.102491	F(1,6)=3.7072929
		between the Cas9WT and other	SIRT6	0.357407	F(1,6)=.99334715
		fusions (for 24h to 48h period).	RFC5	0.133661	F(1,6)=3.0058793
		Statistical values derived using one-way ANOVA test	RFC4	0.038932	F(1,6)=6.9297685
			POLR2H	0.942553	F(1,6)=.00564465
			POLD3	0.0034121	F(1,6)=21.859646
			HMGB1	0.402614	F(1,6)=.81066321
Figure	Cell line	Comparison	Time point	p value	dfs and F
Fig. 3e	BJ-5ta	One-way Anova test for the equality of	8h	0.00134454	F(1,8)=23.101243
		the means at each particular time point	12h	0.0795547	F(1,8)=4.0310738
			24h	0.111338	F(1,8)=3.2020256
			48h	0.246232	F(1,8)=1.5653416
			72h	0.155859	F(1,8)=2.4540071
			96h	0.818074	F(1,8)=.05651055
Figure	Cell line	Comparison	Fusion	P value	Mean of Cas9WT	Mean of Cas9-POLD3	Difference	SE of difference	t ratio	df	q value
Fig. 5g	BJ-5ta	Unpaired, two-sided Student’s t-test	Cas9WT vs Cas9-POLD3, RNF2 locus, HDR	1.6e-05	15.3	44.73	-29.43	1.198	24.58	4	3.3e-05
			Cas9WT vs Cas9-POLD3, RNF2 locus, NHEJ	0.193204	23.43	20.1	3.333	2.133	1.563	4	0.193204
Fig. 5h	BJ-5ta	Unpaired, two-sided Student’s t-test	Cas9WT vs Cas9-POLD3, ELNE locus, HDR	0.000203	5.62	21.52	-15.9	0.7723	20.59	3.101	0.000409
			Cas9WT vs Cas9-POLD3, ELNE locus, NHEJ	0.004251	26.15	49.43	-23.29	2.027	11.49	2.324	0.004293
Figure	Cell line	Comparison	Fusion	P value	Mean of POLD3	Mean of Cas9 WT	Difference	SE of difference	t ratio	df	q value
Fig. 6a	HEK293T	Unpaired, two-sided Student's t-test:	Cas9WT vs Cas9-POLD3	<0.000001	13.34	5.908	-7.428	0.3107	23.91	6	<0.000001
Figure	Cell line	Comparison	Fusion	Mean Diff.	95.00% CI of diff.	Significant?	Summary	Adjusted P Value
Fig. 6c	RPE-1	One-way Anova test,	POLD3 vs. HMGB2	6.788	5.471 to 8.105	Yes	****	<0.0001
		adjusted for multiple comparisons	POLD3 vs. HMGB1	7.974	6.657 to 9.291	Yes	****	<0.0001
		(Tukey)	POLD3 vs. Cas9WT	9.57	8.253 to 10.89	Yes	****	<0.0001
		n=5	HMGB2 vs. HMGB1	1.186	-0.1306 to 2.503	No	ns	0.0869
			HMGB2 vs. Cas9WT	2.782	1.465 to 4.099	Yes	****	<0.0001
			HMGB1 vs. Cas9WT	1.596	0.2794 to 2.913	Yes	*	0.0141
			Test details	Mean 1	Mean 2	Mean Diff.	SE of diff.	n1	n2	q	DF
			POLD3 vs. HMGB2	10.17	3.384	6.788	0.4704	6	6	20.41	20
			POLD3 vs. HMGB1	10.17	2.198	7.974	0.4704	6	6	23.97	20
			POLD3 vs. Cas9WT	10.17	0.602	9.57	0.4704	6	6	28.77	20
			HMGB2 vs. HMGB1	3.384	2.198	1.186	0.4704	6	6	3.566	20
			HMGB2 vs. Cas9WT	3.384	0.602	2.782	0.4704	6	6	8.364	20
			HMGB1 vs. Cas9WT	2.198	0.602	1.596	0.4704	6	6	4.798	20
	Cell line	Comparison	Fusion	Mean Diff.	95.00% CI of diff.	Significant?	Summary	Adjusted P Value
	HEK293T	One-way Anova test,	POLD3 vs. HMGB2	4.532	3.101 to 5.963	Yes	****	<0.0001
		adjusted for multiple comparisons	POLD3 vs. HMGB1	6.73	5.299 to 8.161	Yes	****	<0.0001
		(Tukey)	POLD3 vs. Cas9WT	8.98	7.549 to 10.41	Yes	****	<0.0001
		n=5	HMGB2 vs. HMGB1	2.198	0.7666 to 3.629	Yes	**	0.0023
			HMGB2 vs. Cas9WT	4.448	3.017 to 5.879	Yes	****	<0.0001
			HMGB1 vs. Cas9WT	2.25	0.8186 to 3.681	Yes	**	0.0019
			Test details	Mean 1	Mean 2	Mean Diff.	SE of diff.	n1	n2	q	DF
			POLD3 vs. HMGB2	9.67	5.138	4.532	0.5003	5	5	12.81	16
			POLD3 vs. HMGB1	9.67	2.94	6.73	0.5003	5	5	19.02	16
			POLD3 vs. Cas9WT	9.67	0.69	8.98	0.5003	5	5	25.38	16
			HMGB2 vs. HMGB1	5.138	2.94	2.198	0.5003	5	5	6.213	16
			HMGB2 vs. Cas9WT	5.138	0.69	4.448	0.5003	5	5	12.57	16
			HMGB1 vs. Cas9WT	2.94	0.69	2.25	0.5003	5	5	6.36	16

## Sheet: Supplementary figures
Figure	Cell line	Comparison	Parameter	P value	Mean of Cas9 + guide RNA	Mean of Cas9-POLD3 + guide RNA	Difference	SE of difference	t ratio	df	q value
Fig. S7b	RPE-1	Unpaired, two-sided Student’s t-test	12h	0.611628	0.02273	0.02026	0.00247	0.004372	0.5649	3	0.899967
		Cas9WT vs Cas9-POLD3, RNF2 locus,	24h	0.891057	0.01727	0.01846	-0.001192	0.008004	0.1489	3	0.899967
		total editing	48h	0.720423	0.01022	0.008149	0.002074	0.005274	0.3932	3	0.899967
			72h	0.217317	0.004102	0.01102	-0.006922	0.003892	1.778	2	0.877963
		ANOVA:	p21
		Mixed-effects model (REML)	Matching: Stacked
		Assume sphericity?	No
		Alpha	0.05
		Fixed effects (type III)	P value	P value summary	Statistically significant (P < 0,05)?	F (DFn, DFd)	Geisser-Greenhouse's epsilon
		Row Factor	<0,0001	****	Yes	F (2,176, 31,19) = 58,98	0.7254
		Column Factor	0.1839	ns	No	F (6, 43) = 1,554
		Row Factor x Column Factor	0.3523	ns	No	F (18, 43) = 1,138
		Random effects	SD	Variance
		Subject	0	0
		Residual	0.004684	2.194e-05
		Was the matching effective?
		Chi-square, df
		P value
		P value summary
		Is there significant matching (P < 0.05)?	No
		Data summary
		Number of columns (Column Factor)	7
		Number of rows (Row Factor)	4
		Number of subjects (Subject)	21
Figure	Cell line	Comparison	Parameter	P value	Mean of Cas9 WT	Mean of Cas9-POLD3	Difference	SE of difference	t ratio	df	q value
Fig. S9a	hESC	Comparison between CasWT and	NHEJ %	0.51726	34.4	29.26	5.14	7.247	0.7094	4	0.522433
		Cas9-POLD3 was made for HDR	HDR %	0.110469	6.642	13.08	-6.438	3.15	2.044	4	0.223147
		and NHEJ values using
		unpaired, two-sided Student's t-test
Fig. S9b	PBMCs	Comparison between CasWT and	NHEJ %	0.028378	16.92	19.39	-2.475	0.7373	3.357	4	0.028661
		Cas9-POLD3 was made for HDR	HDR %	0.02424	0.5277	1.231	-0.7032	0.1992	3.53	4	0.028661
		and NHEJ values using
		unpaired, two-sided Student's t-test
